# Supplementary material for: RNA-Seq analysis of differential gene expression in Betula luminifera xylem during the early stages of tension wood formation
Source: PeerJ. 2018 Aug 21;6:e5427. doi: 10.7717/peerj.5427 (PMC6108316; doi:10.7717/peerj.5427)
Supplement: Table S1 [file peerj-06-5427-s001.xlsx]

## Sheet: Sheet1
Sequence alignment of Unigenes involved in cellulose and lignin biosynthesis.
Unigene	Length	Correspondent gene		Coverage	ORF	Identity
		Name	Accession number
Unigene 4901.5	3397 bp	BlCesA1	FJ410444	1	Complete	0.988
Unigene 4901.6	4172 bp	BlCesA2	KC204969	0.993	Complete	0.996
Unigene 4901.4	3294 bp	BlCesA3	FJ410445	0.968	Complete	0.997
Unigene 4901.7	3839 bp	BlCesA4	FJ410446	1	Complete	0.998
Unigene 7287	2502 bp	BlCesA5	FJ410447	0.429	Part	0.99
Unigene 4825	1875 bp	BlCesA5	FJ410447	0.351	Part	0.992
Unigene 5825.1	2174 bp	BlCesA6	KC204970	0.534	Part	0.994
Unigene 5825.2	2211 bp	BlCesA6	KC204970	0.492	Part	0.993
Unigene 4901.8	2604 bp	BlCesA7	KC204971	0.525	Part	0.989
Unigene 4901.1	2134 bp	BlCesA7	KC204971	0.519	Part	0.982
Unigene 4901.2	1708 bp	BlCesA7	KC204971	0.297	Part	0.996
Unigene 5741	3336 bp	BlCesA8	KC204972	0.555	Part	0.995
Unigene 13312	3064 bp	BlSUSY1	KC204973	1	Complete	1
Unigene 824.3	3048 bp	BlSUSY2	KC204974	1	Complete	0.998
Unigene 824.4	2991 bp	BlSUSY2	KC204974	0.519	Part	0.997
Unigene 3783.1	558 bp	BlSUSY3	KC204975	0.2	Part	0.993
Unigene 4487	2425 bp	BlKOR1	KC238469	1	Complete	0.993
Unigene 22801	1755 bp	BlKOR2	KC238470	0.963	Complete	0.994
Unigene 4512.1	2365 bp	BlKOR3	KC238471	0.979	Complete	0.99
Unigene 4512.2	2550 bp	BlKOR3	KC238471	0.907	Complete	0.991
Unigene 5760.2	1276 bp	Bl4CL	FJ410448	0.536	Part	0.997
Unigene 5760.3	2070 bp	Bl4CL	FJ410448	1	Complete	0.993
Unigene 1899.2	1369 bp	BlCCoAOMT	FJ410449	1	Complete	0.989
Unigene 2488	1506 bp	BlCCR	FJ410450	1	Complete	0.992
Unigene 2887.2	1907 bp	BlSAMS1	KC204976	1	Complete	0.998
Unigene 2887.1	806 bp	BlSAMS2	KC204977	0.442	Part	0.991
Unigene 2887.4	1610 bp	BlSAMS3	KC204978	1	Complete	0.997
