# Supplementary material for: RNA-Seq analysis of differential gene expression in Betula luminifera xylem during the early stages of tension wood formation
Source: PeerJ. 2018 Aug 21;6:e5427. doi: 10.7717/peerj.5427 (PMC6108316; doi:10.7717/peerj.5427)
Supplement: Table S3 [file peerj-06-5427-s003.xlsx]

## Sheet: Sheet1
GenBank accession numbers of the other gene suquences used in phylogenetic analysis.
Species	Genes	Accession no.	Species	Genes	Accession no.
Arabidopsis thaliana	AtCesA1	NM_119393	Populus trichocarpa	PtiCesA1-B	Pti763479
	AtCesA2	NM_120095		PtiCesA3-A	Pti560520
	AtCesA3	NM_120599		PtiCesA3-B	Pti576348
	AtCesA4	NM_123770		PtiCesA3-C	Pti821409
	AtCesA5	NM_121024		PtiCesA3-D	Pti706420
	AtCesA6	NM_125870		PtiCesA4	Pti553321
	AtCesA7	NM_121748		PtiCesA6-A	Pti207792
	AtCesA8	NM_117994		PtiCesA6-B	Pti819877
	AtCesA9	NM_127746		PtiCesA6-C	Pti818594
	AtCesA10	NM_128111		PtiCesA6-D	Pti551308
Betula platyphylla	BpCesA1	EU591529		PtiCesA6-E	Pti806784
	BpCesA2	EU591530		PtiCesA6-F	Pti784751
	BpCesA3	EU591531		PtiCesA7-A	Pti717644
	BpCesA4	EU591532		PtiCesA7-B	Pti262611
Eucalyptus grandis	EgraCesA1	DQ014505		PtiCesA8-A	Pti235238
	EgraCesA2	DQ014506		PtiCesA8-B	Pti555650
	EgraCesA3	DQ014507	Populus tremuloides	PtdCesA1	AF072131
	EgraCesA4	DQ014508		PtdCesA2	AY095297
	EgraCesA5	DQ014509		PtdCesA3	AF527387
	EgraCesA6	DQ0145010		PtdCesA4	AY162181
Oryza sativa	OsCesA1	AAU44296		PtdCesA5	AY055724
	OsCesA2	AAP21426		PtdCesA6	AY196961
	OsCesA3	BAD30574		PtdCesA7	AY162180
	OsCesA4	AK100475	Zea mays	ZmCesA2	AF200526
	OsCesA5	AC104487		ZmCesA4	AF200528
	OsCesA6	XM_477282		ZmCesA5	AF200529
	OsCesA7	NM_196933		ZmCesA6	AF200530
	OsCesA8	XM_477093		ZmCesA7	AF200531
	OsCesA9	AK121170		ZmCesA8	AF200532
Pinus taeda	PtCesA1	AY789650		ZmCesA9	AF200533
	PtCesA2	AY789651		ZmCesA10	AY372244
	PtCesA3	AY789652		ZmCesA11	AY372245
Populus trichocarpa	PtiCesA1-A	Pti835809		ZmCesA12	AY372246
Arabidopsis thaliana	AtMYB103	NM_124993	Populus trichocarpa	PtrMYB152	XM_002302907
	AtMYB20	NP_176797		PtrMYB18	XM_002305179
	AtMYB26	NM_112243		PtrMYB128	XM_002304481
	AtMYB42	NM_117305		PtrMYB10	XM_002297978
	AtMYB43	NM_121666		PtrMYB21	XM_002313298
	AtMYB46	NM_121290		PtrMYB2	XM_002299875
	AtMYB52	NM_101658		PtrMYB3	XM_002299908
	AtMYB54	NM_106001		PtrMYB20	XM_002313267
	AtMYB58	NM_101514		PtrMYB161	XM_002309735
	AtMYB63	NM_106569		PtrMYB175	XM_002327991
	AtMYB69	NM_119499		PtrMYB158	XM_002307438
	AtMYB83	NM_111685		PtrMYB189	XM_002300913
	AtMYB85	NM_118394		PtrMYB26	XM_002306212
Eacalyptus grandis	EgMYB1	CAE09058		PtrMYB31	XM_002309877
	EgMYB2	AJ576023		PtrMYB167	XM_002318288
Populus trichocarpa	PtrMYB28	XM_002307154		PtrMYB90	XM_002329715
	PtrMYB192	XM_002310643	Populus tremula × P. tremuloide	Ptt MYB21a	AJ567345
	PtrMYB125	XM_002303490	Pinus taeda	Pt MYB4	AY356371
	PtrMYB92	XM_002329863		Pt MYB1	AY356372
	PtrMYB199	XM_002318842		Pt MYB8	DQ399057
	PtrMYB75	XM_002321802
Arabidopsis thaliana	AtOFP1	NM_120262	Arabidopsis thaliana	AtOFP12	NM_100421
	AtOFP2	NM_128593		AtOFP13	NM_120564
	AtOFP3	NM_125221		AtOFP14	NM_106645
	AtOFP4	NM_100566		AtOFP15	NM_129164
	AtOFP5	NM_117999		AtOFP16	NM_128770
	AtOFP6	NM_148870		AtOFP17	NM_179813
	AtOFP7	NM_127406		AtOFP18	NM_115114
	AtOFP8	NM_121970	Medicago truncatula	MtOFP	AES99348
	AtOFP9	NM_116641	Populus trichocarpa	PtrOFP	EEF04562
	AtOFP10	NM_122129	Solanum lycopersicum	SlOFP	NM_001247292
	AtOFP11	NM_117572	Zea mays	ZmOFP	NM_001153462
