# Supplementary material for: RNA-Seq analysis of differential gene expression in Betula luminifera xylem during the early stages of tension wood formation
Source: PeerJ. 2018 Aug 21;6:e5427. doi: 10.7717/peerj.5427 (PMC6108316; doi:10.7717/peerj.5427)
Supplement: Table S4 [file peerj-06-5427-s004.xlsx]

## Sheet: Sheet1
KEGG pathway annotation of B. luminifera Unigenes.
Number	Pathway	Count (Percent)	Pathway ID	With available maps in KEGG
1	Metabolic pathways	4653 (23.89%)	ko01100	No
2	Biosynthesis of secondary metabolites	2199 (11.29%)	ko01110	No
3	Plant-pathogen interaction	1176 (6.04%)	ko04626	Yes
4	Plant hormone signal transduction	1019 (5.23%)	ko04075	Yes
5	RNA transport	746 (3.83%)	ko03013	Yes
6	Endocytosis	713 (3.66%)	ko04144	Yes
7	Spliceosome	713 (3.66%)	ko03040	Yes
8	Glycerophospholipid metabolism	687 (3.53%)	ko00564	Yes
9	Starch and sucrose metabolism	570 (2.93%)	ko00500	Yes
10	Ether lipid metabolism	566 (2.91%)	ko00565	Yes
11	Purine metabolism	562 (2.89%)	ko00230	Yes
12	Protein processing in endoplasmic reticulum	523 (2.69%)	ko04141	Yes
13	Pyrimidine metabolism	508 (2.61%)	ko00240	Yes
14	mRNA surveillance pathway	421 (2.16%)	ko03015	Yes
15	Ribosome	399 (2.05%)	ko03010	Yes
16	Phenylpropanoid biosynthesis	384 (1.97%)	ko00940	Yes
17	Ubiquitin mediated proteolysis	368 (1.89%)	ko04120	Yes
18	Ribosome biogenesis in eukaryotes	365 (1.87%)	ko03008	Yes
19	Pentose and glucuronate interconversions	345 (1.77%)	ko00040	Yes
20	RNA polymerase	329 (1.69%)	ko03020	Yes
21	RNA degradation	324 (1.66%)	ko03018	Yes
22	Amino sugar and nucleotide sugar metabolism	253 (1.3%)	ko00520	Yes
23	Oxidative phosphorylation	240 (1.23%)	ko00190	Yes
24	Glycolysis / Gluconeogenesis	235 (1.21%)	ko00010	Yes
25	ABC transporters	223 (1.15%)	ko02010	Yes
26	Flavonoid biosynthesis	222 (1.14%)	ko00941	Yes
27	Stilbenoid, diarylheptanoid and gingerol biosynthesis	211 (1.08%)	ko00945	Yes
28	Phagosome	197 (1.01%)	ko04145	Yes
29	Pyruvate metabolism	183 (0.94%)	ko00620	Yes
30	Nucleotide excision repair	171 (0.88%)	ko03420	Yes
31	Carotenoid biosynthesis	171 (0.88%)	ko00906	Yes
32	Limonene and pinene degradation	167 (0.86%)	ko00903	Yes
33	Circadian rhythm - plant	159 (0.82%)	ko04712	Yes
34	Phenylalanine metabolism	158 (0.81%)	ko00360	Yes
35	Other glycan degradation	156 (0.8%)	ko00511	Yes
36	Peroxisome	153 (0.79%)	ko04146	Yes
37	Cysteine and methionine metabolism	150 (0.77%)	ko00270	Yes
38	Galactose metabolism	146 (0.75%)	ko00052	Yes
39	Phosphatidylinositol signaling system	145 (0.74%)	ko04070	Yes
40	Inositol phosphate metabolism	140 (0.72%)	ko00562	Yes
41	Glutathione metabolism	134 (0.69%)	ko00480	Yes
42	Homologous recombination	134 (0.69%)	ko03440	Yes
43	Ascorbate and aldarate metabolism	133 (0.68%)	ko00053	Yes
44	Arginine and proline metabolism	131 (0.67%)	ko00330	Yes
45	Cyanoamino acid metabolism	130 (0.67%)	ko00460	Yes
46	DNA replication	128 (0.66%)	ko03030	Yes
47	Aminoacyl-tRNA biosynthesis	127 (0.65%)	ko00970	Yes
48	Carbon fixation in photosynthetic organisms	126 (0.65%)	ko00710	Yes
49	Glycerolipid metabolism	125 (0.64%)	ko00561	Yes
50	Fructose and mannose metabolism	124 (0.64%)	ko00051	Yes
51	Zeatin biosynthesis	123 (0.63%)	ko00908	Yes
52	Flavone and flavonol biosynthesis	122 (0.63%)	ko00944	Yes
53	Basal transcription factors	121 (0.62%)	ko03022	Yes
54	alpha-Linolenic acid metabolism	117 (0.6%)	ko00592	Yes
55	Proteasome	115 (0.59%)	ko03050	Yes
56	Base excision repair	113 (0.58%)	ko03410	Yes
57	Glycosylphosphatidylinositol(GPI)-anchor biosynthesis	111 (0.57%)	ko00563	Yes
58	Terpenoid backbone biosynthesis	106 (0.54%)	ko00900	Yes
59	Glycine, serine and threonine metabolism	105 (0.54%)	ko00260	Yes
60	Regulation of autophagy	102 (0.52%)	ko04140	Yes
61	Tyrosine metabolism	102 (0.52%)	ko00350	Yes
62	Mismatch repair	102 (0.52%)	ko03430	Yes
63	Glyoxylate and dicarboxylate metabolism	101 (0.52%)	ko00630	Yes
64	Porphyrin and chlorophyll metabolism	99 (0.51%)	ko00860	Yes
65	Propanoate metabolism	99 (0.51%)	ko00640	Yes
66	Cutin, suberine and wax biosynthesis	98 (0.5%)	ko00073	Yes
67	Valine, leucine and isoleucine degradation	97 (0.5%)	ko00280	Yes
68	Photosynthesis	96 (0.49%)	ko00195	Yes
69	Fatty acid metabolism	94 (0.48%)	ko00071	Yes
70	Alanine, aspartate and glutamate metabolism	92 (0.47%)	ko00250	Yes
71	Protein export	91 (0.47%)	ko03060	Yes
72	Phenylalanine, tyrosine and tryptophan biosynthesis	89 (0.46%)	ko00400	Yes
73	Nitrogen metabolism	88 (0.45%)	ko00910	Yes
74	Sphingolipid metabolism	87 (0.45%)	ko00600	Yes
75	Citrate cycle (TCA cycle)	86 (0.44%)	ko00020	Yes
76	Diterpenoid biosynthesis	86 (0.44%)	ko00904	Yes
77	Pentose phosphate pathway	83 (0.43%)	ko00030	Yes
78	Steroid biosynthesis	81 (0.42%)	ko00100	Yes
79	SNARE interactions in vesicular transport	79 (0.41%)	ko04130	Yes
80	Ubiquinone and other terpenoid-quinone biosynthesis	75 (0.39%)	ko00130	Yes
81	Tryptophan metabolism	74 (0.38%)	ko00380	Yes
82	beta-Alanine metabolism	73 (0.37%)	ko00410	Yes
83	Natural killer cell mediated cytotoxicity	71 (0.36%)	ko04650	Yes
84	N-Glycan biosynthesis	69 (0.35%)	ko00510	Yes
85	Fatty acid biosynthesis	68 (0.35%)	ko00061	Yes
86	Lysine degradation	65 (0.33%)	ko00310	Yes
87	Glycosaminoglycan degradation	62 (0.32%)	ko00531	Yes
88	Biosynthesis of unsaturated fatty acids	62 (0.32%)	ko01040	Yes
89	Benzoxazinoid biosynthesis	59 (0.3%)	ko00402	Yes
90	Isoflavonoid biosynthesis	58 (0.3%)	ko00943	Yes
91	Fatty acid elongation	54 (0.28%)	ko00062	Yes
92	Linoleic acid metabolism	52 (0.27%)	ko00591	Yes
93	Sulfur metabolism	52 (0.27%)	ko00920	Yes
94	Histidine metabolism	49 (0.25%)	ko00340	Yes
95	Butanoate metabolism	49 (0.25%)	ko00650	Yes
96	Tropane, piperidine and pyridine alkaloid biosynthesis	47 (0.24%)	ko00960	Yes
97	Pantothenate and CoA biosynthesis	45 (0.23%)	ko00770	Yes
98	Riboflavin metabolism	43 (0.22%)	ko00740	Yes
99	Isoquinoline alkaloid biosynthesis	41 (0.21%)	ko00950	Yes
100	Glycosphingolipid biosynthesis - ganglio series	40 (0.21%)	ko00604	Yes
101	One carbon pool by folate	40 (0.21%)	ko00670	Yes
102	Brassinosteroid biosynthesis	38 (0.2%)	ko00905	Yes
103	Valine, leucine and isoleucine biosynthesis	38 (0.2%)	ko00290	Yes
104	Photosynthesis - antenna proteins	35 (0.18%)	ko00196	Yes
105	Lysine biosynthesis	34 (0.17%)	ko00300	Yes
106	Non-homologous end-joining	34 (0.17%)	ko03450	Yes
107	Sesquiterpenoid and triterpenoid biosynthesis	33 (0.17%)	ko00909	Yes
108	Nicotinate and nicotinamide metabolism	33 (0.17%)	ko00760	Yes
109	Selenocompound metabolism	31 (0.16%)	ko00450	Yes
110	Folate biosynthesis	29 (0.15%)	ko00790	Yes
111	Other types of O-glycan biosynthesis	28 (0.14%)	ko00514	Yes
112	Vitamin B6 metabolism	28 (0.14%)	ko00750	Yes
113	Monoterpenoid biosynthesis	27 (0.14%)	ko00902	Yes
114	Arachidonic acid metabolism	25 (0.13%)	ko00590	Yes
115	Circadian rhythm - mammal	24 (0.12%)	ko04710	Yes
116	Sulfur relay system	22 (0.11%)	ko04122	Yes
117	Indole alkaloid biosynthesis	22 (0.11%)	ko00901	Yes
118	Anthocyanin biosynthesis	21 (0.11%)	ko00942	Yes
119	Thiamine metabolism	21 (0.11%)	ko00730	Yes
120	Glucosinolate biosynthesis	20 (0.1%)	ko00966	Yes
121	Taurine and hypotaurine metabolism	18 (0.09%)	ko00430	Yes
122	Glycosphingolipid biosynthesis - globo series	16 (0.08%)	ko00603	Yes
123	Synthesis and degradation of ketone bodies	14 (0.07%)	ko00072	Yes
124	C5-Branched dibasic acid metabolism	8 (0.04%)	ko00660	Yes
125	Caffeine metabolism	6 (0.03%)	ko00232	Yes
126	Biotin metabolism	6 (0.03%)	ko00780	Yes
127	Lipoic acid metabolism	4 (0.02%)	ko00785	Yes
128	Betalain biosynthesis	3 (0.02%)	ko00965	Yes

## Sheet: Sheet2
Count	Percent
4653	0.2389
2199	0.1129
1176	0.0604
1019	0.0523
746	0.0383
713	0.0366
713	0.0366
687	0.0353
570	0.0293
566	0.0291
562	0.0289
523	0.0269
508	0.0261
421	0.0216
399	0.0205
384	0.0197
368	0.0189
365	0.0187
345	0.0177
329	0.0169
324	0.0166
253	0.013
240	0.0123
235	0.0121
223	0.0115
222	0.0114
211	0.0108
197	0.0101
183	0.0094
171	0.0088
171	0.0088
167	0.0086
159	0.0082
158	0.0081
156	0.008
153	0.0079
150	0.0077
146	0.0075
145	0.0074
140	0.0072
134	0.0069
134	0.0069
133	0.0068
131	0.0067
130	0.0067
128	0.0066
127	0.0065
126	0.0065
125	0.0064
124	0.0064
123	0.0063
122	0.0063
121	0.0062
117	0.006
115	0.0059
113	0.0058
111	0.0057
106	0.0054
105	0.0054
102	0.0052
102	0.0052
102	0.0052
101	0.0052
99	0.0051
99	0.0051
98	0.005
97	0.005
96	0.0049
94	0.0048
92	0.0047
91	0.0047
89	0.0046
88	0.0045
87	0.0045
86	0.0044
86	0.0044
83	0.0043
81	0.0042
79	0.0041
75	0.0039
74	0.0038
73	0.0037
71	0.0036
69	0.0035
68	0.0035
65	0.0033
62	0.0032
62	0.0032
59	0.003
58	0.003
54	0.0028
52	0.0027
52	0.0027
49	0.0025
49	0.0025
47	0.0024
45	0.0023
43	0.0022
41	0.0021
40	0.0021
40	0.0021
38	0.002
38	0.002
35	0.0018
34	0.0017
34	0.0017
33	0.0017
33	0.0017
31	0.0016
29	0.0015
28	0.0014
28	0.0014
27	0.0014
25	0.0013
24	0.0012
22	0.0011
22	0.0011
21	0.0011
21	0.0011
20	0.001
18	0.0009
16	0.0008
14	0.0007
8	0.0004
6	0.0003
6	0.0003
4	0.0002
3	0.0002
27093
