# Supplementary material for: RNA-Seq analysis of differential gene expression in Betula luminifera xylem during the early stages of tension wood formation
Source: PeerJ. 2018 Aug 21;6:e5427. doi: 10.7717/peerj.5427 (PMC6108316; doi:10.7717/peerj.5427)
Supplement: Table S5 [file peerj-06-5427-s005.xlsx]

## Sheet: Sheet1
Annotations of DEGs involved in cellulose and lignin biosynthesis.
GeneID	Length (bp)	Leaf-RPKM	NW-RPKM	TW6h-RPKM	TW48h-RPKM	TW7d-RPKM	Nr-ID	Nr-Evalue	Nr-annotation	Swissprot-ID	Swissprot-Evalue	Swissprot-annotation
Unigene824.3	3048	85.462	270.564	2101.5	2908.7	3223.49	gi|6683114|dbj|BAA89049.1|	0	sucrose synthase [Citrus unshiu]	sp|P49034|SUSY_ALNGL	0	Sucrose synthase OS=Alnus glutinosa GN=SUS1 PE=2 SV=1
Unigene824.4	2991	108.416	239.584	2368.76	3215.5	5502.47	gi|6683114|dbj|BAA89049.1|	0	sucrose synthase [Citrus unshiu]	sp|P49034|SUSY_ALNGL	0	Sucrose synthase OS=Alnus glutinosa GN=SUS1 PE=2 SV=1
Unigene4442	1503	9.96516	9.73357	5.92064	4.2327	3.40532	gi|225436573|ref|XP_002274759.1|	0	PREDICTED: hexokinase-3 [Vitis vinifera] >gi|297734960|emb|CBI17194.3| unnamed protein product [Vitis vinifera]	sp|Q9LPS1|HXK3_ARATH	0	Hexokinase-3 OS=Arabidopsis thaliana GN=At1g50460 PE=1 SV=1
Unigene4205	810	32.2751	3.4254	6.71371	6.69045	6.01786	gi|326580272|gb|ADZ96378.1|	3e-122	hexokinase 1 [Eriobotrya japonica]	sp|Q9SEK3|HXK1_SPIOL	2e-112	Hexokinase-1 OS=Spinacia oleracea GN=HXK1 PE=2 SV=1
Unigene17798	439	0.001	89.6321	57.9959	7.51409	34.4211	gi|297734728|emb|CBI16962.3|	5e-65	unnamed protein product [Vitis vinifera]	sp|Q0J8G4|SCRK2_ORYSJ	4e-57	Fructokinase-2 OS=Oryza sativa subsp. japonica GN=FRK2 PE=1 SV=1
Unigene17799	296	0.001	72.432	45.0948	6.36812	24.7017	gi|297734728|emb|CBI16962.3|	4e-47	unnamed protein product [Vitis vinifera]	sp|Q0J8G4|SCRK2_ORYSJ	3e-42	Fructokinase-2 OS=Oryza sativa subsp. japonica GN=FRK2 PE=1 SV=1
Unigene572	1551	31.604	63.7496	372.613	638.043	615.987	gi|356538893|ref|XP_003537935.1|	2e-157	PREDICTED: fructokinase-2-like [Glycine max]	sp|Q9SID0|SCRK1_ARATH	2e-149	Probable fructokinase-1 OS=Arabidopsis thaliana GN=At2g31390 PE=2 SV=1
Unigene2006	626	7.39529	8.86445	11.0563	4.51668	3.50401	gi|356498012|ref|XP_003517849.1|	6e-95	PREDICTED: uncharacterized protein LOC100786248 [Glycine max]	sp|P37829|SCRK_SOLTU	8e-17	Fructokinase OS=Solanum tuberosum PE=2 SV=1
Unigene5034	861	27.2004	6.73795	9.18696	3.28391	1.13228	gi|298569778|gb|ADI87417.1|	1e-112	fructokinase-like protein 1 [Gossypium hirsutum]	sp|Q42896|SCRK2_SOLLC	1e-19	Fructokinase-2 OS=Solanum lycopersicum GN=FRK2 PE=2 SV=2
Unigene8328	509	23.5405	9.91095	6.79885	3.70327	1.91531	gi|298569778|gb|ADI87417.1|	1e-41	fructokinase-like protein 1 [Gossypium hirsutum]	--	--	--
Unigene738.2	2282	33.5329	10.0584	9.42385	6.60811	4.80612	gi|356535925|ref|XP_003536492.1|	0	PREDICTED: phosphoglucomutase, chloroplastic-like [Glycine max]	sp|Q9SM59|PGMP_PEA	0	Phosphoglucomutase, chloroplastic OS=Pisum sativum GN=PGMP PE=2 SV=1
Unigene716.1	2323	7.97151	8.79507	10.8537	7.30291	3.46228	gi|359486666|ref|XP_002274127.2|	0	PREDICTED: phosphoglucomutase-like [Vitis vinifera] >gi|296086013|emb|CBI31454.3| unnamed protein product [Vitis vinifera]	--	--	--
Unigene4395.2	330	10.7278	3.05738	9.73765	10.71	4.43134	gi|225427306|ref|XP_002281997.1|	1e-48	PREDICTED: phosphoacetylglucosamine mutase isoform 2 [Vitis vinifera]	sp|P57750|AGM1_ARATH	3e-43	Phosphoacetylglucosamine mutase OS=Arabidopsis thaliana GN=DRT101 PE=1 SV=1
Unigene6504.1	1875	3.19523	7.53338	11.865	18.2213	18.9779	gi|192338746|gb|ACF04278.1|	0	UTP-glucose 1 phosphate uridylyltransferase [Eucalyptus grandis]	sp|P19595|UGPA_SOLTU	0	UTP--glucose-1-phosphate uridylyltransferase OS=Solanum tuberosum PE=1 SV=3
Unigene6504.2	2023	3.90376	5.48605	14.1738	15.4906	18.6738	gi|192338746|gb|ACF04278.1|	0	UTP-glucose 1 phosphate uridylyltransferase [Eucalyptus grandis]	sp|P19595|UGPA_SOLTU	0	UTP--glucose-1-phosphate uridylyltransferase OS=Solanum tuberosum PE=1 SV=3
Unigene10137	1185	41.1354	10.4299	7.92666	3.77788	6.37589	gi|356568154|ref|XP_003552278.1|	2e-162	PREDICTED: uncharacterized protein LOC100788781 [Glycine max]	--	--	--
Unigene1443	2171	40.1394	21.2615	7.85623	12.264	14.3697	gi|255563554|ref|XP_002522779.1|	0	cellulose synthase, putative [Ricinus communis] >gi|223538017|gb|EEF39630.1| cellulose synthase, putative [Ricinus communis]	sp|Q651X6|CSLE6_ORYSJ	0	Cellulose synthase-like protein E6 OS=Oryza sativa subsp. japonica GN=CSLE6 PE=2 SV=1
Unigene8043	445	17.1348	28.3409	11.1095	24.8857	12.5969	gi|224096488|ref|XP_002310629.1|	7e-81	predicted protein [Populus trichocarpa] >gi|222853532|gb|EEE91079.1| predicted protein [Populus trichocarpa]	sp|Q8L778|CESA5_ARATH	1e-79	Cellulose synthase A catalytic subunit 5 [UDP-forming] OS=Arabidopsis thaliana GN=CESA5 PE=1 SV=2
Unigene5825.1	2174	7.89154	10.7901	5.00286	10.7297	5.3812	gi|255585634|ref|XP_002533503.1|	0	Cellulose synthase A catalytic subunit 6 [UDP-forming], putative [Ricinus communis] >gi|223526627|gb|EEF28872.1| Cellulose synthase A catalytic subunit 6 [UDP-forming], putative [Ricinus communis]	sp|Q9SJ22|CESA9_ARATH	0	Probable cellulose synthase A catalytic subunit 9 [UDP-forming] OS=Arabidopsis thaliana GN=CESA9 PE=2 SV=1
Unigene2490.1	1302	14.8501	29.6404	15.378	27.3262	10.2955	gi|224083850|ref|XP_002307145.1|	1e-132	hypothetical protein POPTRDRAFT_760228 [Populus trichocarpa] >gi|222856594|gb|EEE94141.1| hypothetical protein POPTRDRAFT_760228 [Populus trichocarpa]	sp|Q94JQ6|CESA6_ARATH	1e-107	Cellulose synthase A catalytic subunit 6 [UDP-forming] OS=Arabidopsis thaliana GN=CESA6 PE=1 SV=2
Unigene11088	1410	15.4508	7.15557	17.3557	9.85929	6.39558	gi|359483534|ref|XP_002269610.2|	2e-166	PREDICTED: cellulose synthase A catalytic subunit 8 [UDP-forming] [Vitis vinifera]	--	--	--
Unigene4901.8	2604	12.4448	20.3414	16.5171	16.1062	9.82756	gi|359476121|ref|XP_002282575.2|	0	PREDICTED: LOW QUALITY PROTEIN: cellulose synthase A catalytic subunit 1 [UDP-forming]-like [Vitis vinifera]	sp|O48946|CESA1_ARATH	0	Cellulose synthase A catalytic subunit 1 [UDP-forming] OS=Arabidopsis thaliana GN=CESA1 PE=1 SV=1
Unigene28417	663	9.44703	12.9351	97.6816	62.9032	70.2129	gi|225460638|ref|XP_002265955.1|	5e-22	PREDICTED: cellulose synthase A catalytic subunit 6 [UDP-forming] [Vitis vinifera]	sp|O48947|CESA2_ARATH	3e-21	Cellulose synthase A catalytic subunit 2 [UDP-forming] OS=Arabidopsis thaliana GN=CESA2 PE=1 SV=1
Unigene5741	3336	6.12232	10.0561	50.3117	38.9169	32.1458	gi|224066625|ref|XP_002302169.1|	0	cellulose synthase [Populus trichocarpa] >gi|222843895|gb|EEE81442.1| cellulose synthase [Populus trichocarpa]	sp|O48947|CESA2_ARATH	0	Cellulose synthase A catalytic subunit 2 [UDP-forming] OS=Arabidopsis thaliana GN=CESA2 PE=1 SV=1
Unigene20546	278	0.979571	2.72195	81.8028	126.286	42.0817	gi|356562549|ref|XP_003549532.1|	8e-08	PREDICTED: cellulose synthase A catalytic subunit 7 [UDP-forming]-like isoform 1 [Glycine max]	sp|Q9SWW6|CESA7_ARATH	1e-07	Cellulose synthase A catalytic subunit 7 [UDP-forming] OS=Arabidopsis thaliana GN=CESA7 PE=1 SV=1
Unigene2726.1	3595	5.52974	23.7149	34.9293	50.139	32.6772	gi|255558007|ref|XP_002520032.1|	0	Cellulose synthase A catalytic subunit 3 [UDP-forming], putative [Ricinus communis] >gi|223540796|gb|EEF42356.1| Cellulose synthase A catalytic subunit 3 [UDP-forming], putative [Ricinus communis]	sp|Q9M9M4|CSLD3_ARATH	0	Cellulose synthase-like protein D3 OS=Arabidopsis thaliana GN=CSLD3 PE=1 SV=1
Unigene4901.4	3294	1.40542	34.0753	699.011	783.97	746.782	gi|212960378|gb|ACJ38665.1|	5e-32	cellulose synthase [Betula luminifera]	sp|Q9SWW6|CESA7_ARATH	0	Cellulose synthase A catalytic subunit 7 [UDP-forming] OS=Arabidopsis thaliana GN=CESA7 PE=1 SV=1
Unigene4901.5	3397	2.16446	36.2349	538.106	635.766	623.837	gi|212960342|gb|ACJ38664.1|	0	cellulose synthase [Betula luminifera]	sp|Q8LPK5|CESA8_ARATH	0	Cellulose synthase A catalytic subunit 8 [UDP-forming] OS=Arabidopsis thaliana GN=CESA8 PE=1 SV=1
Unigene4901.7	3839	2.05712	45.4665	681.421	857.722	904.043	gi|212960417|gb|ACJ38666.1|	0	cellulose synthase [Betula luminifera]	sp|Q84JA6|CESA4_ARATH	0	Cellulose synthase A catalytic subunit 4 [UDP-forming] OS=Arabidopsis thaliana GN=CESA4 PE=1 SV=1
Unigene7321	2667	18.6857	36.5063	44.21	41.9646	9.86957	gi|224058299|ref|XP_002299478.1|	0	predicted protein [Populus trichocarpa] >gi|222846736|gb|EEE84283.1| predicted protein [Populus trichocarpa]	sp|Q42059|GUN6_ARATH	0	Endoglucanase 6 OS=Arabidopsis thaliana GN=At1g64390 PE=2 SV=2
Unigene13265	1678	0.973733	29.312	4.272	61.7836	34.5686	gi|224099525|ref|XP_002311518.1|	0	predicted protein [Populus trichocarpa] >gi|222851338|gb|EEE88885.1| predicted protein [Populus trichocarpa]	sp|Q9CAC1|GUN8_ARATH	0	Endoglucanase 8 OS=Arabidopsis thaliana GN=CEL1 PE=2 SV=1
Unigene4487	2425	151.938	297.896	989.562	983.193	821.222	gi|225469870|ref|XP_002269783.1|	0	PREDICTED: endoglucanase 25 [Vitis vinifera]	sp|Q38890|GUN25_ARATH	0	Endoglucanase 25 OS=Arabidopsis thaliana GN=KOR PE=1 SV=1
Unigene6138.2	1013	0.001	11.4539	4.14824	28.6094	32.721	gi|359493565|ref|XP_002269875.2|	1e-150	PREDICTED: endoglucanase 9-like [Vitis vinifera] >gi|297734804|emb|CBI17038.3| unnamed protein product [Vitis vinifera]	sp|Q9C9H5|GUN9_ARATH	2e-136	Endoglucanase 9 OS=Arabidopsis thaliana GN=CEL3 PE=1 SV=1
Unigene2273.1	499	0.001	8.59313	1.48609	17.943	16.118	gi|2290683|gb|AAB65156.1|	2e-81	basic cellulase [Citrus sinensis]	sp|Q2V4L8|GUN3_ARATH	7e-75	Endoglucanase 3 OS=Arabidopsis thaliana GN=CEL5 PE=2 SV=2
Unigene5203.1	2593	2.62554	32.6844	481.504	730.032	558.787	gi|255556976|ref|XP_002519521.1|	0	Phenylalanine ammonia-lyase, putative [Ricinus communis] >gi|223541384|gb|EEF42935.1| Phenylalanine ammonia-lyase, putative [Ricinus communis]	sp|O64963|PAL1_PRUAV	0	Phenylalanine ammonia-lyase 1 OS=Prunus avium GN=PAL1 PE=2 SV=1
Unigene5203.2	2436	45.834	171.78	454.393	587.697	472.039	gi|39777534|gb|AAR31107.1|	0	phenylalanine ammonia-lyase [Quercus suber]	sp|Q42667|PALY_CITLI	0	Phenylalanine ammonia-lyase OS=Citrus limon GN=PAL6 PE=2 SV=1
Unigene4150.2	2531	21.196	1.8935	10.3523	2.979	0.866658	gi|303387290|gb|ADM15576.1|	0	phenylalanine ammonialyase [Betula platyphylla]	sp|P52777|PALY_PINTA	0	Phenylalanine ammonia-lyase OS=Pinus taeda GN=PAL PE=3 SV=1
Unigene6807	1879	101.885	284.988	836.804	1385.01	959.588	gi|255565927|ref|XP_002523952.1|	0	cinnamate 4-hydroxylase, putative [Ricinus communis] >gi|223536799|gb|EEF38439.1| cinnamate 4-hydroxylase, putative [Ricinus communis]	sp|Q96423|TCMO_GLYEC	0	Trans-cinnamate 4-monooxygenase OS=Glycyrrhiza echinata GN=CYP73A14 PE=2 SV=1
Unigene9998	1895	6.17931	1.19794	31.9582	238.853	13.2472	gi|225462528|ref|XP_002266037.1|	0	PREDICTED: trans-cinnamate 4-monooxygenase [Vitis vinifera]	sp|Q43240|TCMO_ZINEL	0	Trans-cinnamate 4-monooxygenase OS=Zinnia elegans GN=CYP73A12 PE=2 SV=1
Unigene3801.1	1909	21.9683	28.8041	31.7238	17.0328	13.9161	gi|255539150|ref|XP_002510640.1|	0	AMP dependent CoA ligase, putative [Ricinus communis] >gi|223551341|gb|EEF52827.1| AMP dependent CoA ligase, putative [Ricinus communis]	sp|Q84P21|4CLL5_ARATH	0	4-coumarate--CoA ligase-like 5 OS=Arabidopsis thaliana GN=4CLL5 PE=1 SV=2
Unigene14665	1831	0.297456	19.9748	14.8501	8.62183	9.45077	gi|255556908|ref|XP_002519487.1|	0	AMP dependent CoA ligase, putative [Ricinus communis] >gi|223541350|gb|EEF42901.1| AMP dependent CoA ligase, putative [Ricinus communis]	sp|Q9M0X9|4CLL7_ARATH	0	4-coumarate--CoA ligase-like 7 OS=Arabidopsis thaliana GN=4CLL7 PE=1 SV=1
Unigene5760.2	1276	1.92076	23.3257	102.672	137.199	80.6045	gi|212960469|gb|ACJ38668.1|	0	4-coumarate coenzyme A ligase [Betula luminifera]	sp|O24146|4CL2_TOBAC	7e-140	4-coumarate--CoA ligase 2 OS=Nicotiana tabacum GN=4CL2 PE=2 SV=1
Unigene5760.3	2070	7.63024	78.1072	525.54	587.799	534.425	gi|212960469|gb|ACJ38668.1|	0	4-coumarate coenzyme A ligase [Betula luminifera]	sp|O24146|4CL2_TOBAC	0	4-coumarate--CoA ligase 2 OS=Nicotiana tabacum GN=4CL2 PE=2 SV=1
Unigene10698	329	3.31089	1.53334	12.7726	25.7822	11.8528	gi|212960469|gb|ACJ38668.1|	9e-24	4-coumarate coenzyme A ligase [Betula luminifera]	sp|O24146|4CL2_TOBAC	2e-21	4-coumarate--CoA ligase 2 OS=Nicotiana tabacum GN=4CL2 PE=2 SV=1
Unigene5093.1	1902	34.9349	32.7559	8.57745	15.3612	31.01	gi|380042376|gb|AFD33352.1|	0	acyl-activating enzyme 8 [Cannabis sativa]	sp|Q9SMT7|4CLLA_ARATH	0	4-coumarate--CoA ligase-like 10 OS=Arabidopsis thaliana GN=4CLL10 PE=2 SV=1
Unigene375	504	32.4191	11.5107	5.39495	3.74001	5.80294	gi|302141678|emb|CBI18881.3|	4e-48	unnamed protein product [Vitis vinifera]	sp|Q10S72|4CLL4_ORYSJ	1e-45	4-coumarate--CoA ligase-like 4 OS=Oryza sativa subsp. japonica GN=4CLL4 PE=2 SV=1
Unigene5950.1	879	20.7571	123.678	518.276	681.664	669.893	gi|255570490|ref|XP_002526203.1|	1e-133	cytochrome P450, putative [Ricinus communis] >gi|223534481|gb|EEF36182.1| cytochrome P450, putative [Ricinus communis]	sp|O48922|C98A2_SOYBN	1e-132	Cytochrome P450 98A2 OS=Glycine max GN=CYP98A2 PE=2 SV=1
Unigene4200.2	907	24.0195	298.954	718.94	1007.43	771.209	gi|224089905|ref|XP_002308860.1|	2e-137	cytochrome P450 [Populus trichocarpa] >gi|183585157|gb|ACC63870.1| coumaroyl 3-hydroxylase [Populus trichocarpa] >gi|222854836|gb|EEE92383.1| cytochrome P450 [Populus trichocarpa]	sp|O48922|C98A2_SOYBN	4e-130	Cytochrome P450 98A2 OS=Glycine max GN=CYP98A2 PE=2 SV=1
Unigene2207.2	695	1.56731	11.6136	38.0561	36.9534	23.145	gi|396578192|gb|AFN85668.1|	6e-33	putative hydroxycinnamoyl CoA shikimate/quinate hydroxycinnamoyl transferase [Hibiscus cannabinus]	sp|Q9FI78|HCT_ARATH	1e-30	Hydroxycinnamoyl-Coenzyme A shikimate/quinate hydroxycinnamoyltransferase OS=Arabidopsis thaliana GN=HCT PE=2 SV=1
Unigene4426.2	1847	8.40405	63.0926	264.718	289.327	346.649	gi|396578192|gb|AFN85668.1|	0	putative hydroxycinnamoyl CoA shikimate/quinate hydroxycinnamoyl transferase [Hibiscus cannabinus]	sp|Q9FI78|HCT_ARATH	0	Hydroxycinnamoyl-Coenzyme A shikimate/quinate hydroxycinnamoyltransferase OS=Arabidopsis thaliana GN=HCT PE=2 SV=1
Unigene832.2	1130	0.963967	1.56251	3.49999	4.17027	1.29411	gi|225425440|ref|XP_002272063.1|	4e-89	PREDICTED: putative caffeoyl-CoA O-methyltransferase At1g67980-like [Vitis vinifera]	sp|P93711|CAMT_POPKI	9e-80	Caffeoyl-CoA O-methyltransferase OS=Populus kitakamiensis PE=2 SV=1
Unigene167.1	1091	3.7441	4.8551	5.43765	5.39918	9.60597	gi|255546215|ref|XP_002514167.1|	3e-100	o-methyltransferase, putative [Ricinus communis] >gi|223546623|gb|EEF48121.1| o-methyltransferase, putative [Ricinus communis]	sp|Q9C5D7|CAMT3_ARATH	5e-92	Probable caffeoyl-CoA O-methyltransferase At4g26220 OS=Arabidopsis thaliana GN=At4g26220 PE=2 SV=1
Unigene1899.1	907	28.5231	16.6858	75.2189	72.9981	80.8829	gi|194321206|gb|ACF48821.1|	2e-123	caffeoyl-CoA-O-methyltransferase [Gossypium hirsutum]	sp|Q43095|CAMT_POPTM	2e-122	Caffeoyl-CoA O-methyltransferase OS=Populus tremuloides PE=2 SV=1
Unigene1899.2	1369	23.8703	396.13	1950.23	2479.43	2448.98	gi|212960493|gb|ACJ38669.1|	9e-141	caffeoyl-CoA O-methyltransferase [Betula luminifera]	sp|Q43095|CAMT_POPTM	4e-132	Caffeoyl-CoA O-methyltransferase OS=Populus tremuloides PE=2 SV=1
Unigene3019	1221	19.6267	27.4751	14.5761	9.64866	23.5539	gi|224138952|ref|XP_002326731.1|	1e-138	predicted protein [Populus trichocarpa] >gi|222834053|gb|EEE72530.1| predicted protein [Populus trichocarpa]	sp|Q9SAH9|CCR2_ARATH	2e-36	Cinnamoyl-CoA reductase 2 OS=Arabidopsis thaliana GN=CCR2 PE=1 SV=1
Unigene431.16	1337	2.64785	14.3379	4.9918	2.64346	7.10936	gi|394305112|gb|AFN26940.1|	5e-149	cinnamoyl-CoA reductase [Betula platyphylla]	sp|Q9S9N9|CCR1_ARATH	9e-56	Cinnamoyl-CoA reductase 1 OS=Arabidopsis thaliana GN=CCR1 PE=1 SV=1
Unigene8730	1439	7.38048	44.6974	51.0177	15.8827	34.7209	gi|346680627|gb|AEO45117.1|	0	cinnamoyl-CoA reductase [Betula platyphylla]	sp|Q9S9N9|CCR1_ARATH	3e-33	Cinnamoyl-CoA reductase 1 OS=Arabidopsis thaliana GN=CCR1 PE=1 SV=1
Unigene589.2	636	1.28453	17.0535	4.6639	12.9665	10.73	gi|359488343|ref|XP_002283020.2|	2e-56	PREDICTED: bifunctional dihydroflavonol 4-reductase/flavanone 4-reductase-like [Vitis vinifera]	sp|Q500U8|TKPR1_ARATH	1e-11	Tetraketide alpha-pyrone reductase 1 OS=Arabidopsis thaliana GN=TKPR1 PE=2 SV=1
Unigene10100	1268	3.65099	72.01	158.098	112.607	165.494	gi|225453895|ref|XP_002278887.1|	8e-138	PREDICTED: dihydroflavonol-4-reductase [Vitis vinifera] >gi|296089143|emb|CBI38846.3| unnamed protein product [Vitis vinifera]	sp|P51103|DFRA_CALCH	1e-82	Dihydroflavonol-4-reductase OS=Callistephus chinensis GN=F PE=2 SV=1
Unigene2488	1506	104.697	201.821	477.96	590.772	604.454	gi|212960522|gb|ACJ38670.1|	0	cinnamoyl CoA reductase [Betula luminifera]	sp|Q9S9N9|CCR1_ARATH	1e-153	Cinnamoyl-CoA reductase 1 OS=Arabidopsis thaliana GN=CCR1 PE=1 SV=1
Unigene2715.3	2753	0.494589	318.476	1384.89	1789.79	1140.18	gi|225431217|ref|XP_002272644.1|	0	PREDICTED: cytochrome P450 84A1 [Vitis vinifera]	sp|Q42600|C84A1_ARATH	0	Cytochrome P450 84A1 OS=Arabidopsis thaliana GN=CYP84A1 PE=2 SV=1
Unigene2715.1	1431	0.190301	17.8027	106.06	77.7168	138.808	gi|147787265|emb|CAN73481.1|	0	hypothetical protein VITISV_026695 [Vitis vinifera]	sp|Q42600|C84A1_ARATH	0	Cytochrome P450 84A1 OS=Arabidopsis thaliana GN=CYP84A1 PE=2 SV=1
Unigene11074	1752	17.7195	358.483	2844.9	2553.09	2228.29	gi|239586194|gb|ACN41351.2|	0	putative caffeic acid O-methyltransferase [Betula pendula]	sp|Q8GU25|COMT1_ROSCH	0	Caffeic acid 3-O-methyltransferase OS=Rosa chinensis GN=COMT1 PE=2 SV=1
Unigene11183	423	0.643784	22.6593	7.59675	18.3817	7.49032	gi|359473984|ref|XP_003631385.1|	1e-40	PREDICTED: LOW QUALITY PROTEIN: caffeic acid 3-O-methyltransferase 1-like [Vitis vinifera]	sp|P28002|COMT1_MEDSA	2e-30	Caffeic acid 3-O-methyltransferase OS=Medicago sativa PE=1 SV=1
Unigene954	316	2.58532	35.1212	13.298	28.3341	11.5692	gi|147841251|emb|CAN64514.1|	1e-13	hypothetical protein VITISV_023818 [Vitis vinifera]	sp|Q8GU25|COMT1_ROSCH	1e-09	Caffeic acid 3-O-methyltransferase OS=Rosa chinensis GN=COMT1 PE=2 SV=1
Unigene1159	1587	53.0228	593.314	1073.48	1075.66	1478.16	gi|122200954|sp|Q2KNL5.1|CADH1_OCIBA	0	RecName: Full=Cinnamyl alcohol dehydrogenase 1; Short=CAD 1; Short=ObaCAD1 >gi|62461970|gb|AAX83108.1| cinnamyl alcohol dehydrogenase [Ocimum basilicum]	sp|Q2KNL5|CADH1_OCIBA	0	Cinnamyl alcohol dehydrogenase 1 OS=Ocimum basilicum GN=CAD1 PE=1 SV=1
Unigene1103	1333	30.4395	71.3369	30.7824	40.3012	37.8475	gi|225431409|ref|XP_002279832.1|	2e-179	PREDICTED: probable cinnamyl alcohol dehydrogenase 9 [Vitis vinifera] >gi|296088646|emb|CBI37637.3| unnamed protein product [Vitis vinifera]	sp|P42734|CADH9_ARATH	9e-178	Probable cinnamyl alcohol dehydrogenase 9 OS=Arabidopsis thaliana GN=CAD9 PE=2 SV=2
Unigene263.1	1431	7.23144	21.6805	8.11864	13.6663	14.9879	gi|57229665|gb|AAW45741.1|	0	sinapyl alcohol dehydrogenase-like protein [Populus tremula x Populus tremuloides]	sp|Q9ZRF1|MTDH_FRAAN	8e-164	Probable mannitol dehydrogenase OS=Fragaria ananassa GN=CAD PE=2 SV=1
Unigene419	867	49.6271	288.018	1641.07	1219.41	2759.95	gi|255543014|ref|XP_002512570.1|	2e-88	s-adenosylmethionine synthetase, putative [Ricinus communis] >gi|223548531|gb|EEF50022.1| s-adenosylmethionine synthetase, putative [Ricinus communis]	sp|A7Q0V4|METK5_VITVI	8e-89	S-adenosylmethionine synthase 5 OS=Vitis vinifera GN=METK5 PE=3 SV=1
Unigene2887.1	806	68.9249	389.304	1415.34	1504.64	2401.55	gi|359487692|ref|XP_002280318.2|	1e-127	PREDICTED: S-adenosylmethionine synthase 4, partial [Vitis vinifera]	sp|A7PRJ6|METK4_VITVI	5e-129	S-adenosylmethionine synthase 4 OS=Vitis vinifera GN=METK4 PE=3 SV=1
Unigene2887.2	1907	79.1115	89.545	662.491	693.393	526.555	gi|3024127|sp|Q96552.1|METK2_CATRO	0	RecName: Full=S-adenosylmethionine synthase 2; Short=AdoMet synthase 2; AltName: Full=Methionine adenosyltransferase 2; Short=MAT 2 >gi|1655578|emb|CAA95857.1| S-adenosyl-L-methionine synthetase 2 [Catharanthus roseus]	sp|Q96552|METK2_CATRO	0	S-adenosylmethionine synthase 2 OS=Catharanthus roseus GN=SAMS2 PE=1 SV=1
Unigene2887.3	2244	304.723	441.746	2113.75	1984.08	2087.62	gi|255543014|ref|XP_002512570.1|	0	s-adenosylmethionine synthetase, putative [Ricinus communis] >gi|223548531|gb|EEF50022.1| s-adenosylmethionine synthetase, putative [Ricinus communis]	sp|Q9AT56|METK1_ELAUM	0	S-adenosylmethionine synthase 1 OS=Elaeagnus umbellata GN=SAMS1 PE=2 SV=1
Unigene2887.4	1610	7.27316	52.3268	917.2	1370.84	1369.7	gi|255556894|ref|XP_002519480.1|	0	s-adenosylmethionine synthetase, putative [Ricinus communis] >gi|223541343|gb|EEF42894.1| s-adenosylmethionine synthetase, putative [Ricinus communis]	sp|P50302|METK2_ACTCH	0	S-adenosylmethionine synthase 2 OS=Actinidia chinensis GN=SAM2 PE=2 SV=1
Unigene20182	1151	0.236595	27.3929	6.6575	1.02355	2.11749	gi|255561669|ref|XP_002521844.1|	1e-128	Peroxidase 10 precursor, putative [Ricinus communis] >gi|223538882|gb|EEF40480.1| Peroxidase 10 precursor, putative [Ricinus communis]	sp|Q9FX85|PER10_ARATH	6e-114	Peroxidase 10 OS=Arabidopsis thaliana GN=PER10 PE=1 SV=1
Unigene13914	1286	0.423516	19.0254	55.9341	37.0103	52.3077	gi|206812328|gb|ACI22425.1|	2e-163	pericarp peroxidase 3 [Litchi chinensis]	sp|Q9FJZ9|PER72_ARATH	1e-143	Peroxidase 72 OS=Arabidopsis thaliana GN=PER72 PE=1 SV=1
Unigene4354.3	1120	41.5775	32.4301	13.6835	3.57638	17.1912	gi|255553951|ref|XP_002518016.1|	3e-140	Peroxidase 47 precursor, putative [Ricinus communis] >gi|223542998|gb|EEF44534.1| Peroxidase 47 precursor, putative [Ricinus communis]	sp|Q9SZB9|PER47_ARATH	9e-123	Peroxidase 47 OS=Arabidopsis thaliana GN=PER47 PE=2 SV=2
Unigene3308.3	1191	13.9476	0.423566	8.30182	4.15451	2.66029	gi|211906542|gb|ACJ11764.1|	1e-136	class III peroxidase [Gossypium hirsutum]	sp|Q96518|PER16_ARATH	6e-123	Peroxidase 16 OS=Arabidopsis thaliana GN=PER16 PE=1 SV=2
