# Supplementary material for: RNA-Seq analysis of differential gene expression in Betula luminifera xylem during the early stages of tension wood formation
Source: PeerJ. 2018 Aug 21;6:e5427. doi: 10.7717/peerj.5427 (PMC6108316; doi:10.7717/peerj.5427)
Supplement: Table S6 [file peerj-06-5427-s006.xlsx]

## Sheet: Sheet1
Annotations of Unigenes involved in auxin polar transport and related response.
GeneID	Length	Leaf-RPKM	NW-RPKM	TW6h-RPKM	TW48h-RPKM	TW7d-RPKM	Nr-ID	Nr-Evalue	Nr-annotation	Swissprot-ID	Swissprot-Evalue	Swissprot-annotation
Unigene13275	2917	7.65523	5.70704	5.33862	6.46199	7.85396	gi|225435334|ref|XP_002282437.1|	0	PREDICTED: auxin response factor 18-like [Vitis vinifera]	sp|Q653H7|ARFR_ORYSJ	0	Auxin response factor 18 OS=Oryza sativa subsp. japonica GN=ARF18 PE=2 SV=1
Unigene13740	1104	4.68668	1.37084	4.03022	9.60409	13.6874	gi|224087106|ref|XP_002308067.1|	2e-57	predicted protein [Populus trichocarpa] >gi|222854043|gb|EEE91590.1| predicted protein [Populus trichocarpa]	sp|Q93WC4|IAA29_ARATH	4e-24	Auxin-responsive protein IAA29 OS=Arabidopsis thaliana GN=IAA29 PE=2 SV=2
Unigene5005.1	733	1.48606	4.81756	2.69781	4.8217	8.64503	gi|224107927|ref|XP_002314656.1|	1e-72	predicted protein [Populus trichocarpa] >gi|222863696|gb|EEF00827.1| predicted protein [Populus trichocarpa]	sp|P33077|IAA4_ARATH	6e-63	Auxin-responsive protein IAA4 OS=Arabidopsis thaliana GN=IAA4 PE=1 SV=2
Unigene12914	3101	30.8238	72.4735	30.1311	52.8835	44.4848	gi|255550359|ref|XP_002516230.1|	0	Auxin response factor, putative [Ricinus communis] >gi|223544716|gb|EEF46232.1| Auxin response factor, putative [Ricinus communis]	sp|Q8RYC8|ARFS_ARATH	0	Auxin response factor 19 OS=Arabidopsis thaliana GN=ARF19 PE=1 SV=2
Unigene4698.2	4028	3.44795	5.38533	3.31382	1.16991	0.786595	gi|225443952|ref|XP_002279808.1|	0	PREDICTED: auxin response factor 6-like [Vitis vinifera]	sp|Q9ZTX8|ARFF_ARATH	0	Auxin response factor 6 OS=Arabidopsis thaliana GN=ARF6 PE=2 SV=2
Unigene7784	450	17.5496	39.2364	24.1694	13.6136	4.87447	gi|297736017|emb|CBI24055.3|	2e-46	unnamed protein product [Vitis vinifera]	sp|Q6Z2W3|ARFE_ORYSJ	6e-38	Auxin response factor 5 OS=Oryza sativa subsp. japonica GN=ARF5 PE=2 SV=2
Unigene10295	469	25.5482	67.2265	24.7714	16.5788	2.59833	gi|255557566|ref|XP_002519813.1|	1e-81	Auxin response factor, putative [Ricinus communis] >gi|223541052|gb|EEF42609.1| Auxin response factor, putative [Ricinus communis]	sp|Q0D9R7|ARFS_ORYSJ	6e-78	Auxin response factor 19 OS=Oryza sativa subsp. japonica GN=ARF19 PE=2 SV=2
Unigene831	888	19.9334	29.8249	9.74271	14.8589	5.48927	gi|47496692|dbj|BAD19061.1|	5e-146	auxin response factor 1 [Cucumis sativus]	sp|Q8RYC8|ARFS_ARATH	3e-140	Auxin response factor 19 OS=Arabidopsis thaliana GN=ARF19 PE=1 SV=2
Unigene12796	3296	34.7011	35.5852	22.6488	26.1642	22.7751	gi|255547630|ref|XP_002514872.1|	0	conserved hypothetical protein [Ricinus communis] >gi|223545923|gb|EEF47426.1| conserved hypothetical protein [Ricinus communis]	sp|P93022|ARFG_ARATH	1e-11	Auxin response factor 7 OS=Arabidopsis thaliana GN=ARF7 PE=1 SV=2
Unigene3342.2	1542	91.6566	96.6733	51.1365	38.8116	32.5597	gi|225456475|ref|XP_002284543.1|	0	PREDICTED: auxin response factor 2 [Vitis vinifera] >gi|297734502|emb|CBI15749.3| unnamed protein product [Vitis vinifera]	sp|Q94JM3|ARFB_ARATH	0	Auxin response factor 2 OS=Arabidopsis thaliana GN=ARF2 PE=1 SV=2
Unigene3942	1864	250.699	344.792	158.868	125.9	155.596	gi|225456475|ref|XP_002284543.1|	0	PREDICTED: auxin response factor 2 [Vitis vinifera] >gi|297734502|emb|CBI15749.3| unnamed protein product [Vitis vinifera]	sp|Q94JM3|ARFB_ARATH	1e-137	Auxin response factor 2 OS=Arabidopsis thaliana GN=ARF2 PE=1 SV=2
Unigene3204	886	2.45888	1.99282	3.3479	1.86156	4.95149	gi|255545568|ref|XP_002513844.1|	2e-52	Auxin response factor, putative [Ricinus communis] >gi|223546930|gb|EEF48427.1| Auxin response factor, putative [Ricinus communis]	sp|Q84WU6|ARFQ_ARATH	7e-13	Auxin response factor 17 OS=Arabidopsis thaliana GN=ARF17 PE=2 SV=1
Unigene1221	520	15.1871	24.7383	18.539	15.4059	22.9662	gi|255560645|ref|XP_002521336.1|	5e-57	protein with unknown function [Ricinus communis] >gi|223539414|gb|EEF41004.1| protein with unknown function [Ricinus communis]	sp|P93022|ARFG_ARATH	4e-11	Auxin response factor 7 OS=Arabidopsis thaliana GN=ARF7 PE=1 SV=2
Unigene9001	2694	8.89541	19.2874	10.46	6.55959	10.8563	gi|206572097|gb|ACI13681.1|	0	putative auxin response factor ARF16 [Malus x domestica]	sp|Q653H7|ARFR_ORYSJ	0	Auxin response factor 18 OS=Oryza sativa subsp. japonica GN=ARF18 PE=2 SV=1
Unigene2469.2	1076	2.53086	4.21952	2.06755	0.875912	1.81207	gi|224123424|ref|XP_002319075.1|	6e-112	predicted protein [Populus trichocarpa] >gi|222857451|gb|EEE94998.1| predicted protein [Populus trichocarpa]	sp|O24407|IAA16_ARATH	3e-88	Auxin-responsive protein IAA16 OS=Arabidopsis thaliana GN=IAA16 PE=1 SV=1
Unigene8556	797	8.88374	7.5955	11.1653	2.66071	7.03342	gi|224097892|ref|XP_002311089.1|	3e-92	predicted protein [Populus trichocarpa] >gi|222850909|gb|EEE88456.1| predicted protein [Populus trichocarpa]	sp|Q653H7|ARFR_ORYSJ	9e-65	Auxin response factor 18 OS=Oryza sativa subsp. japonica GN=ARF18 PE=2 SV=1
Unigene13207	1065	15.342	26.9997	16.247	13.9381	15.5617	gi|296088177|emb|CBI35669.3|	1e-98	unnamed protein product [Vitis vinifera]	sp|Q94JM3|ARFB_ARATH	3e-97	Auxin response factor 2 OS=Arabidopsis thaliana GN=ARF2 PE=1 SV=2
Unigene1959.2	2147	26.5091	68.0221	41.6775	17.7785	25.0875	gi|225443952|ref|XP_002279808.1|	0	PREDICTED: auxin response factor 6-like [Vitis vinifera]	sp|Q9ZTX8|ARFF_ARATH	0	Auxin response factor 6 OS=Arabidopsis thaliana GN=ARF6 PE=2 SV=2
Unigene5662.2	332	30.349	91.1688	232.296	77.3573	63.8673	gi|356550522|ref|XP_003543635.1|	6e-56	PREDICTED: auxin-responsive protein IAA27-like [Glycine max]	sp|Q9ZSY8|IAA27_ARATH	7e-47	Auxin-responsive protein IAA27 OS=Arabidopsis thaliana GN=IAA27 PE=1 SV=1
Unigene247	869	34.471	82.4331	269.658	99.5082	61.9826	gi|359482910|ref|XP_003632858.1|	7e-89	PREDICTED: auxin-responsive protein IAA27-like isoform 2 [Vitis vinifera]	sp|Q38826|IAA8_ARATH	3e-31	Auxin-responsive protein IAA8 OS=Arabidopsis thaliana GN=IAA8 PE=1 SV=1
Unigene9944	3626	26.1356	84.9359	63.1941	39.5083	24.1976	gi|359484941|ref|XP_002266603.2|	0	PREDICTED: auxin response factor 5-like [Vitis vinifera]	sp|Q0D9R7|ARFS_ORYSJ	0	Auxin response factor 19 OS=Oryza sativa subsp. japonica GN=ARF19 PE=2 SV=2
Unigene269.3	1476	0.184499	2.73424	4.52171	0.319269	1.32099	gi|359482888|ref|XP_002283588.2|	1e-58	PREDICTED: auxin-responsive protein IAA26-like [Vitis vinifera]	sp|Q8LQ74|IAA6_ORYSJ	5e-14	Auxin-responsive protein IAA6 OS=Oryza sativa subsp. japonica GN=IAA6 PE=2 SV=1
Unigene269.2	2207	1.85084	66.1728	102.257	7.15295	22.3073	gi|359482888|ref|XP_002283588.2|	2e-125	PREDICTED: auxin-responsive protein IAA26-like [Vitis vinifera]	sp|Q8LQ74|IAA6_ORYSJ	3e-61	Auxin-responsive protein IAA6 OS=Oryza sativa subsp. japonica GN=IAA6 PE=2 SV=1
Unigene13869	2019	15.1065	42.6011	39.545	22.6401	41.8881	gi|225425242|ref|XP_002268849.1|	7e-156	PREDICTED: auxin response factor 2-like [Vitis vinifera]	sp|Q94JM3|ARFB_ARATH	5e-131	Auxin response factor 2 OS=Arabidopsis thaliana GN=ARF2 PE=1 SV=2
Unigene11230	638	28.5979	31.2327	77.488	58.7204	79.8404	gi|302398567|gb|ADL36578.1|	1e-19	ARF domain class transcription factor [Malus x domestica]	sp|Q5NB25|IAA3_ORYSJ	3e-19	Auxin-responsive protein IAA3 OS=Oryza sativa subsp. japonica GN=IAA3 PE=2 SV=1
Unigene3028	2917	51.6261	67.2739	81.9436	71.9704	76.3672	gi|225465265|ref|XP_002268348.1|	0	PREDICTED: auxin response factor 1 [Vitis vinifera] >gi|297739458|emb|CBI29640.3| unnamed protein product [Vitis vinifera]	sp|Q8L7G0|ARFA_ARATH	0	Auxin response factor 1 OS=Arabidopsis thaliana GN=ARF1 PE=1 SV=2
Unigene2769.2	3651	3.1327	63.0757	95.0561	25.7498	39.9864	gi|359483904|ref|XP_002273401.2|	0	PREDICTED: auxin response factor 3-like [Vitis vinifera]	sp|O23661|ARFC_ARATH	0	Auxin response factor 3 OS=Arabidopsis thaliana GN=ARF3 PE=1 SV=2
Unigene4708	850	5.76679	6.82515	12.7955	13.5828	9.74894	gi|225455248|ref|XP_002272754.1|	3e-51	PREDICTED: uncharacterized protein LOC100257141 [Vitis vinifera]	sp|Q0D9R7|ARFS_ORYSJ	2e-06	Auxin response factor 19 OS=Oryza sativa subsp. japonica GN=ARF19 PE=2 SV=2
Unigene2022.3	1538	0.531185	4.26403	3.05367	2.75759	1.74315	gi|255555629|ref|XP_002518850.1|	1e-150	hypothetical protein RCOM_1311830 [Ricinus communis] >gi|223541837|gb|EEF43383.1| hypothetical protein RCOM_1311830 [Ricinus communis]	sp|Q9XED8|ARFI_ARATH	4e-76	Auxin response factor 9 OS=Arabidopsis thaliana GN=ARF9 PE=2 SV=1
Unigene2022.2	3043	1.07389	5.05628	2.27447	2.16805	1.44168	gi|255555629|ref|XP_002518850.1|	0	hypothetical protein RCOM_1311830 [Ricinus communis] >gi|223541837|gb|EEF43383.1| hypothetical protein RCOM_1311830 [Ricinus communis]	sp|Q9XED8|ARFI_ARATH	0	Auxin response factor 9 OS=Arabidopsis thaliana GN=ARF9 PE=2 SV=1
Unigene9945	3233	26.9541	62.1807	56.0432	49.1939	38.8993	gi|118486652|gb|ABK95163.1|	0	unknown [Populus trichocarpa]	sp|Q9ZTX8|ARFF_ARATH	0	Auxin response factor 6 OS=Arabidopsis thaliana GN=ARF6 PE=2 SV=2
Unigene10322	776	0.001	5.52574	6.68933	9.41267	2.82669	gi|27450533|gb|AAO14628.1|AF467900_5	3e-86	hypothetical transcription factor [Prunus persica]	sp|P93024|ARFE_ARATH	2e-70	Auxin response factor 5 OS=Arabidopsis thaliana GN=ARF5 PE=1 SV=3
Unigene4078.1	3228	0.168724	2.03162	3.82879	2.40876	2.41609	gi|359479063|ref|XP_002285019.2|	0	PREDICTED: auxin response factor 4-like [Vitis vinifera] >gi|297746231|emb|CBI16287.3| unnamed protein product [Vitis vinifera]	sp|Q9ZTX9|ARFD_ARATH	0	Auxin response factor 4 OS=Arabidopsis thaliana GN=ARF4 PE=2 SV=1
Unigene4078.2	3350	0.243869	2.03293	4.5748	3.72772	4.14694	gi|359479063|ref|XP_002285019.2|	0	PREDICTED: auxin response factor 4-like [Vitis vinifera] >gi|297746231|emb|CBI16287.3| unnamed protein product [Vitis vinifera]	sp|Q9ZTX9|ARFD_ARATH	0	Auxin response factor 4 OS=Arabidopsis thaliana GN=ARF4 PE=2 SV=1
Unigene3848	1006	1.08279	196.823	228.021	175.193	239.847	gi|255552973|ref|XP_002517529.1|	6e-66	Auxin-responsive protein IAA1, putative [Ricinus communis] >gi|223543161|gb|EEF44693.1| Auxin-responsive protein IAA1, putative [Ricinus communis]	sp|Q5VRD1|IAA1_ORYSJ	5e-53	Auxin-responsive protein IAA1 OS=Oryza sativa subsp. japonica GN=IAA1 PE=2 SV=1
Unigene6424.2	1368	8.16166	9.9566	15.9009	19.2906	14.7873	gi|302398567|gb|ADL36578.1|	1e-144	ARF domain class transcription factor [Malus x domestica]	sp|Q38827|IAA9_ARATH	2e-106	Auxin-responsive protein IAA9 OS=Arabidopsis thaliana GN=IAA9 PE=1 SV=1
Unigene1079	1110	8.09602	96.3488	134.06	229.04	160.726	gi|224092498|ref|XP_002309635.1|	1e-60	predicted protein [Populus trichocarpa] >gi|222855611|gb|EEE93158.1| predicted protein [Populus trichocarpa]	sp|Q93WC4|IAA29_ARATH	2e-36	Auxin-responsive protein IAA29 OS=Arabidopsis thaliana GN=IAA29 PE=2 SV=2
Unigene8228	1749	127.519	762.326	451.409	750.375	584.713	gi|313765825|gb|ADR80320.1|	3e-162	indole-3-acetic acid-induced protein 9 [Vitis vinifera]	sp|Q38827|IAA9_ARATH	1e-104	Auxin-responsive protein IAA9 OS=Arabidopsis thaliana GN=IAA9 PE=1 SV=1
Unigene6424.1	2098	47.2473	76.9445	86.9512	90.1826	118.725	gi|302398567|gb|ADL36578.1|	8e-139	ARF domain class transcription factor [Malus x domestica]	sp|Q38827|IAA9_ARATH	9e-101	Auxin-responsive protein IAA9 OS=Arabidopsis thaliana GN=IAA9 PE=1 SV=1
Unigene2022.1	2992	15.6548	169.111	50.6435	58.8263	66.8773	gi|359489584|ref|XP_002264072.2|	0	PREDICTED: auxin response factor 18-like [Vitis vinifera]	sp|Q9XED8|ARFI_ARATH	0	Auxin response factor 9 OS=Arabidopsis thaliana GN=ARF9 PE=2 SV=1
Unigene5935	1614	13.6667	56.7292	116.089	91.5328	160.972	gi|359480055|ref|XP_002269922.2|	2e-95	PREDICTED: auxin-responsive protein IAA11-like [Vitis vinifera]	sp|Q38829|IAA11_ARATH	2e-56	Auxin-responsive protein IAA11 OS=Arabidopsis thaliana GN=IAA11 PE=1 SV=1
Unigene5662.1	1743	22.4981	768.278	479.199	436.77	729.353	gi|225445174|ref|XP_002284118.1|	1e-139	PREDICTED: auxin-responsive protein IAA27 isoform 1 [Vitis vinifera]	sp|Q9ZSY8|IAA27_ARATH	1e-93	Auxin-responsive protein IAA27 OS=Arabidopsis thaliana GN=IAA27 PE=1 SV=1
Unigene2444	1037	193.802	221.343	157.084	172.455	68.863	gi|224127334|ref|XP_002320048.1|	1e-59	SAUR family protein [Populus trichocarpa] >gi|222860821|gb|EEE98363.1| SAUR family protein [Populus trichocarpa]	sp|P33080|AX10A_SOYBN	1e-12	Auxin-induced protein X10A OS=Glycine max PE=2 SV=1
Unigene960.3	447	21.3227	38.3711	56.958	39.0065	17.993	gi|359477983|ref|XP_003632047.1|	7e-29	PREDICTED: auxin-induced protein PCNT115 isoform 2 [Vitis vinifera]	sp|P40691|A115_TOBAC	6e-29	Auxin-induced protein PCNT115 OS=Nicotiana tabacum PE=2 SV=1
Unigene4020.1	563	7.25544	8.51233	2.19526	3.76658	3.03031	gi|225427810|ref|XP_002270504.1|	1e-51	PREDICTED: auxin-induced protein 15A [Vitis vinifera] >gi|147856535|emb|CAN82489.1| hypothetical protein VITISV_036184 [Vitis vinifera]	sp|P33081|AX15A_SOYBN	2e-18	Auxin-induced protein 15A OS=Glycine max PE=2 SV=1
Unigene3758.3	1552	3.15836	2.2753	1.5927	0.607269	1.57038	gi|224099697|ref|XP_002311582.1|	2e-134	predicted protein [Populus trichocarpa] >gi|222851402|gb|EEE88949.1| predicted protein [Populus trichocarpa]	sp|Q6J163|5NG4_PINTA	4e-60	Auxin-induced protein 5NG4 OS=Pinus taeda PE=2 SV=1
Unigene5005.2	1003	31.2232	1.50888	5.66829	0.704747	4.85989	gi|255551959|ref|XP_002517024.1|	1e-71	Auxin-responsive protein IAA4, putative [Ricinus communis] >gi|223543659|gb|EEF45187.1| Auxin-responsive protein IAA4, putative [Ricinus communis]	sp|O24542|AX22D_VIGRR	7e-66	Auxin-induced protein 22D OS=Vigna radiata var. radiata GN=AUX22D PE=2 SV=1
Unigene4560.2	665	37.2649	33.7576	37.1709	24.0935	27.8541	gi|357464091|ref|XP_003602327.1|	7e-50	Auxin-induced protein 10A5 [Medicago truncatula] >gi|355491375|gb|AES72578.1| Auxin-induced protein 10A5 [Medicago truncatula]	sp|P33079|A10A5_SOYBN	4e-13	Auxin-induced protein 10A5 OS=Glycine max PE=2 SV=1
Unigene19253	787	12.1108	6.08951	5.02539	1.49695	0.92906	gi|225426934|ref|XP_002265485.1|	1e-45	PREDICTED: uncharacterized protein LOC100255700 [Vitis vinifera] >gi|297741147|emb|CBI31878.3| unnamed protein product [Vitis vinifera]	sp|P33080|AX10A_SOYBN	5e-12	Auxin-induced protein X10A OS=Glycine max PE=2 SV=1
Unigene13033	859	16.1681	3.52364	4.31641	1.09718	1.41865	gi|356524437|ref|XP_003530835.1|	4e-45	PREDICTED: auxin-induced protein 5NG4-like [Glycine max]	sp|Q6J163|5NG4_PINTA	2e-13	Auxin-induced protein 5NG4 OS=Pinus taeda PE=2 SV=1
Unigene6349	806	19.2584	1.56473	3.37351	1.754	2.41909	gi|359474183|ref|XP_002273800.2|	6e-97	PREDICTED: auxin-induced protein 5NG4-like [Vitis vinifera]	sp|Q6J163|5NG4_PINTA	1e-42	Auxin-induced protein 5NG4 OS=Pinus taeda PE=2 SV=1
Unigene2832	869	60.7943	17.4155	12.8002	11.9301	10.0967	gi|224128011|ref|XP_002320219.1|	5e-54	SAUR family protein [Populus trichocarpa] >gi|222860992|gb|EEE98534.1| SAUR family protein [Populus trichocarpa]	sp|P33079|A10A5_SOYBN	4e-12	Auxin-induced protein 10A5 OS=Glycine max PE=2 SV=1
Unigene6090.1	912	4.18036	3.59544	3.52349	2.84191	6.94826	gi|359485108|ref|XP_002267577.2|	3e-111	PREDICTED: auxin-induced protein 5NG4-like [Vitis vinifera]	sp|Q6J163|5NG4_PINTA	8e-33	Auxin-induced protein 5NG4 OS=Pinus taeda PE=2 SV=1
Unigene9691	1586	101.305	2234	139.491	42.3403	347.913	gi|224057224|ref|XP_002299181.1|	3e-174	predicted protein [Populus trichocarpa] >gi|222846439|gb|EEE83986.1| predicted protein [Populus trichocarpa]	sp|Q6J163|5NG4_PINTA	2e-64	Auxin-induced protein 5NG4 OS=Pinus taeda PE=2 SV=1
Unigene12460	1500	20.8779	37.4988	25.8722	16.9647	23.7224	gi|255552664|ref|XP_002517375.1|	1e-155	Auxin-induced protein 5NG4, putative [Ricinus communis] >gi|223543386|gb|EEF44917.1| Auxin-induced protein 5NG4, putative [Ricinus communis]	sp|Q6J163|5NG4_PINTA	1e-41	Auxin-induced protein 5NG4 OS=Pinus taeda PE=2 SV=1
Unigene4560.1	835	15.0021	16.3121	25.7548	10.4407	17.2212	gi|357464091|ref|XP_003602327.1|	9e-52	Auxin-induced protein 10A5 [Medicago truncatula] >gi|355491375|gb|AES72578.1| Auxin-induced protein 10A5 [Medicago truncatula]	sp|P33079|A10A5_SOYBN	5e-13	Auxin-induced protein 10A5 OS=Glycine max PE=2 SV=1
Unigene1955	1388	36.1002	52.3367	47.0153	38.7042	42.1424	gi|224135771|ref|XP_002322156.1|	7e-141	predicted protein [Populus trichocarpa] >gi|222869152|gb|EEF06283.1| predicted protein [Populus trichocarpa]	sp|Q6J163|5NG4_PINTA	1e-60	Auxin-induced protein 5NG4 OS=Pinus taeda PE=2 SV=1
Unigene7938	679	5.2138	31.9471	37.8607	9.36929	10.7683	gi|225440847|ref|XP_002282286.1|	1e-45	PREDICTED: indole-3-acetic acid-induced protein ARG7 [Vitis vinifera] >gi|297740132|emb|CBI30314.3| unnamed protein product [Vitis vinifera]	sp|P33081|AX15A_SOYBN	4e-10	Auxin-induced protein 15A OS=Glycine max PE=2 SV=1
Unigene7840	1026	0.79626	53.8394	13.4917	2.98544	14.9655	gi|225460670|ref|XP_002266148.1|	2e-149	PREDICTED: auxin-induced protein 5NG4 [Vitis vinifera] >gi|147788033|emb|CAN73719.1| hypothetical protein VITISV_041298 [Vitis vinifera]	sp|Q6J163|5NG4_PINTA	3e-65	Auxin-induced protein 5NG4 OS=Pinus taeda PE=2 SV=1
Unigene12509	1598	48.7383	26.202	148.188	50.5743	118.354	gi|225447614|ref|XP_002273270.1|	4e-147	PREDICTED: uncharacterized protein LOC100258038 [Vitis vinifera]	sp|Q94BT2|AIR12_ARATH	1e-24	Auxin-induced in root cultures protein 12 OS=Arabidopsis thaliana GN=AIR12 PE=1 SV=3
Unigene611.1	831	1.31081	25.4966	0.297457	2.26831	8.2121	gi|359475784|ref|XP_002264165.2|	9e-99	PREDICTED: auxin-induced protein 5NG4-like [Vitis vinifera]	sp|Q6J163|5NG4_PINTA	3e-42	Auxin-induced protein 5NG4 OS=Pinus taeda PE=2 SV=1
Unigene8651	1465	8.17892	415.282	4.72439	64.3332	273.17	gi|224066845|ref|XP_002302243.1|	1e-151	predicted protein [Populus trichocarpa] >gi|222843969|gb|EEE81516.1| predicted protein [Populus trichocarpa]	sp|Q6J163|5NG4_PINTA	3e-63	Auxin-induced protein 5NG4 OS=Pinus taeda PE=2 SV=1
Unigene1745	600	16.7931	36.1535	0.823955	28.2744	5.68688	gi|224060467|ref|XP_002300214.1|	2e-46	SAUR family protein [Populus trichocarpa] >gi|222847472|gb|EEE85019.1| SAUR family protein [Populus trichocarpa]	sp|P33083|AX6B_SOYBN	2e-09	Auxin-induced protein 6B OS=Glycine max PE=2 SV=1
Unigene3662	493	9.94275	6.13956	7.0195	15.7717	11.8648	gi|356502709|ref|XP_003520159.1|	5e-34	PREDICTED: auxin-induced protein 22B-like [Glycine max]	sp|O24543|AX22E_VIGRR	8e-34	Auxin-induced protein 22E OS=Vigna radiata var. radiata GN=AUX22E PE=2 SV=1
Unigene1018	1030	29.3472	60.9769	62.8766	160.817	82.8186	gi|359495509|ref|XP_003635006.1|	8e-50	PREDICTED: auxin-induced in root cultures protein 12-like [Vitis vinifera]	sp|Q94BT2|AIR12_ARATH	5e-48	Auxin-induced in root cultures protein 12 OS=Arabidopsis thaliana GN=AIR12 PE=1 SV=3
Unigene2902	766	0.71102	30.6237	36.1422	20.9167	17.1815	gi|255544640|ref|XP_002513381.1|	1e-46	Indole-3-acetic acid-induced protein ARG7, putative [Ricinus communis] >gi|223547289|gb|EEF48784.1| Indole-3-acetic acid-induced protein ARG7, putative [Ricinus communis]	sp|P33082|AXX15_SOYBN	3e-10	Auxin-induced protein X15 OS=Glycine max PE=2 SV=1
Unigene11089	1736	16.471	23.2474	70.0552	49.6757	48.9974	gi|224074159|ref|XP_002304279.1|	2e-142	mtn21-like protein [Populus trichocarpa] >gi|222841711|gb|EEE79258.1| mtn21-like protein [Populus trichocarpa]	sp|Q6J163|5NG4_PINTA	7e-35	Auxin-induced protein 5NG4 OS=Pinus taeda PE=2 SV=1
Unigene2010	683	1.19614	13.6642	11.2193	11.7293	6.06632	gi|224058761|ref|XP_002299626.1|	2e-65	predicted protein [Populus trichocarpa] >gi|222846884|gb|EEE84431.1| predicted protein [Populus trichocarpa]	sp|P13088|AUX22_SOYBN	3e-65	Auxin-induced protein AUX22 OS=Glycine max GN=AUX22 PE=2 SV=1
Unigene13169	1054	10.5931	6.4614	30.2534	26.6023	18.0365	gi|342730594|gb|AEL33280.1|	1e-124	putative auxin-induced protein [Camellia sinensis]	sp|Q6J163|5NG4_PINTA	2e-43	Auxin-induced protein 5NG4 OS=Pinus taeda PE=2 SV=1
Unigene6293.1	1617	16.5043	821.437	443.163	914.067	463.482	gi|356509972|ref|XP_003523716.1|	0	PREDICTED: auxin-induced protein 5NG4-like [Glycine max]	sp|Q6J163|5NG4_PINTA	2e-136	Auxin-induced protein 5NG4 OS=Pinus taeda PE=2 SV=1
Unigene11305	534	12.2391	12.7534	27.7738	32.6515	27.3847	gi|296085454|emb|CBI29186.3|	2e-60	unnamed protein product [Vitis vinifera]	sp|Q6J163|5NG4_PINTA	6e-14	Auxin-induced protein 5NG4 OS=Pinus taeda PE=2 SV=1
Unigene5305	674	0.404037	31.0614	19.0708	33.5602	18.0804	gi|359492215|ref|XP_003634383.1|	3e-43	PREDICTED: indole-3-acetic acid-induced protein ARG7 [Vitis vinifera] >gi|147807620|emb|CAN73226.1| hypothetical protein VITISV_026201 [Vitis vinifera]	sp|P33081|AX15A_SOYBN	6e-18	Auxin-induced protein 15A OS=Glycine max PE=2 SV=1
Unigene1140	1253	3.26003	20.9356	16.1766	15.0436	14.9774	gi|356524437|ref|XP_003530835.1|	3e-132	PREDICTED: auxin-induced protein 5NG4-like [Glycine max]	sp|Q6J163|5NG4_PINTA	9e-44	Auxin-induced protein 5NG4 OS=Pinus taeda PE=2 SV=1
Unigene13128	1308	4.16393	52.6451	36.8512	38.3694	35.2169	gi|255538892|ref|XP_002510511.1|	2e-70	Auxin-induced protein 6B, putative [Ricinus communis] >gi|223551212|gb|EEF52698.1| Auxin-induced protein 6B, putative [Ricinus communis]	sp|P33083|AX6B_SOYBN	3e-12	Auxin-induced protein 6B OS=Glycine max PE=2 SV=1
Unigene4540	1572	0.519696	322.834	540.603	547.083	479.23	gi|359485809|ref|XP_002262661.2|	0	PREDICTED: uncharacterized protein LOC100253083 [Vitis vinifera]	sp|Q94BT2|AIR12_ARATH	4e-10	Auxin-induced in root cultures protein 12 OS=Arabidopsis thaliana GN=AIR12 PE=1 SV=3
Unigene9612	1557	56.8428	233.28	203.846	325.359	317.921	gi|255584675|ref|XP_002533060.1|	5e-145	dopamine beta-monooxygenase, putative [Ricinus communis] >gi|223527158|gb|EEF29330.1| dopamine beta-monooxygenase, putative [Ricinus communis]	sp|Q94BT2|AIR12_ARATH	3e-42	Auxin-induced in root cultures protein 12 OS=Arabidopsis thaliana GN=AIR12 PE=1 SV=3
Unigene6481.3	1806	45.3868	2.51396	3.55861	4.56629	1.34952	gi|126217796|gb|ABN81351.1|	0	auxin influx transport protein [Casuarina glauca]	sp|Q9FEL6|LAX3_MEDTR	0	Auxin transporter-like protein 3 OS=Medicago truncatula GN=LAX3 PE=2 SV=1
Unigene6481.2	2463	129.582	133.439	222.097	109.727	106.276	gi|126217792|gb|ABN81349.1|	0	auxin influx transport protein [Casuarina glauca] >gi|126217794|gb|ABN81350.1| auxin influx transport protein [Casuarina glauca]	sp|Q9FEL7|LAX2_MEDTR	0	Auxin transporter-like protein 2 OS=Medicago truncatula GN=LAX2 PE=2 SV=1
Unigene6481.1	1276	0.001	105.163	92.5981	116.148	86.9077	gi|365189140|emb|CCF23027.1|	8e-165	auxin influx carrier protein [Mangifera indica] >gi|381280185|gb|AFG18187.1| auxin influx carrier component [Mangifera indica]	sp|Q8L883|LAX5_MEDTR	8e-160	Auxin transporter-like protein 5 OS=Medicago truncatula GN=LAX5 PE=2 SV=1
Unigene8487	715	0.001	70.2021	53.2402	70.5213	42.609	gi|365189142|emb|CCF23028.1|	1e-107	auxin influx carrier protein [Mangifera indica] >gi|381280187|gb|AFG18188.1| auxin influx carrier component [Mangifera indica]	sp|Q8L883|LAX5_MEDTR	6e-104	Auxin transporter-like protein 5 OS=Medicago truncatula GN=LAX5 PE=2 SV=1
Unigene1611	3176	8.23136	167.573	87.7917	101.415	91.3963	gi|357492621|ref|XP_003616599.1|	0	Auxin influx protein [Medicago truncatula] >gi|75262337|sp|Q9FEL8.1|LAX1_MEDTR RecName: Full=Auxin transporter-like protein 1; AltName: Full=AUX1-like protein 1; AltName: Full=MtLAX1 >gi|28624758|gb|AAM55302.1| auxin influx carrier protein [Medicago truncatula] >gi|355517934|gb|AES99557.1| Auxin influx protein [Medicago truncatula]	sp|Q9FEL8|LAX1_MEDTR	0	Auxin transporter-like protein 1 OS=Medicago truncatula GN=LAX1 PE=2 SV=1
Unigene8645	1710	106.699	6.78524	5.05937	5.51159	7.69653	gi|224101827|ref|XP_002312436.1|	0	auxin efflux carrier component [Populus trichocarpa] >gi|222852256|gb|EEE89803.1| auxin efflux carrier component [Populus trichocarpa]	sp|Q9S7Z8|PIN3_ARATH	5e-158	Auxin efflux carrier component 3 OS=Arabidopsis thaliana GN=PIN3 PE=1 SV=1
Unigene13162	1732	0.001	48.0584	21.9785	18.3653	13.0868	gi|359492309|ref|XP_002278449.2|	0	PREDICTED: probable auxin efflux carrier component 6-like [Vitis vinifera]	sp|Q9SQH6|PIN6_ARATH	0	Probable auxin efflux carrier component 6 OS=Arabidopsis thaliana GN=PIN6 PE=2 SV=2
Unigene177	697	0.001	5.06639	4.61037	9.12733	3.84642	gi|359481415|ref|XP_002282640.2|	6e-67	PREDICTED: probable auxin efflux carrier component 1c-like isoform 1 [Vitis vinifera]	sp|Q67UL3|PIN1C_ORYSJ	7e-60	Probable auxin efflux carrier component 1c OS=Oryza sativa subsp. japonica GN=PIN1C PE=2 SV=1
Unigene4686	765	0.001	2.63774	2.58496	9.85601	5.41608	gi|21435940|gb|AAM54034.1|AF515435_1	1e-115	PIN1-like auxin transport protein [Populus tremula x Populus tremuloides]	sp|P0C0X5|PIN1B_ORYSJ	7e-93	Probable auxin efflux carrier component 1b OS=Oryza sativa subsp. japonica GN=PIN1B PE=2 SV=1
Unigene2979	3098	2.72497	36.0683	15.2397	43.732	26.9842	gi|225456149|ref|XP_002282220.1|	0	PREDICTED: probable auxin efflux carrier component 1c isoform 1 [Vitis vinifera] >gi|147816248|emb|CAN64182.1| hypothetical protein VITISV_007800 [Vitis vinifera]	sp|Q9C6B8|PINI_ARATH	0	Auxin efflux carrier component 1 OS=Arabidopsis thaliana GN=PIN1 PE=1 SV=1
