# Supplementary material for: RNA-Seq analysis of differential gene expression in Betula luminifera xylem during the early stages of tension wood formation
Source: PeerJ. 2018 Aug 21;6:e5427. doi: 10.7717/peerj.5427 (PMC6108316; doi:10.7717/peerj.5427)
Supplement: Table S7 [file peerj-06-5427-s007.xlsx]

## Sheet: Sheet1
RPKM values and annotations of co-expressed Unigenes with CesA, SUS, KOR, UGP and FRK during TW formation.
GeneID	Length	Leaf-RPKM	NW-RPKM	TW6h-RPKM	TW48h-RPKM	TW7d-RPKM	Nr-ID	Nr-Evalue	Nr-annotation	Swissprot-ID	Swissprot-Evalue	Swissprot-annotation
Unigene1022	1134	20.8923	28.6933	62.9955	79.579	88.7635	gi|255542616|ref|XP_002512371.1|	5e-147	Protein YIPF1, putative [Ricinus communis] >gi|223548332|gb|EEF49823.1| Protein YIPF1, putative [Ricinus communis]	--	--	--
Unigene10235	1444	17.7273	17.8171	5.649	3.26344	4.72594	gi|224132268|ref|XP_002321297.1|	0	multidrug resistance protein ABC transporter family [Populus trichocarpa] >gi|222862070|gb|EEE99612.1| multidrug resistance protein ABC transporter family [Populus trichocarpa]	sp|Q7GB25|AB5C_ARATH	0	ABC transporter C family member 5 OS=Arabidopsis thaliana GN=ABCC5 PE=2 SV=2
Unigene10270	919	4.44484	6.31271	8.87612	12.3066	12.995	gi|15242448|ref|NP_199373.1|	1e-117	YEATS family protein [Arabidopsis thaliana] >gi|39545912|gb|AAR28019.1| TAF14b [Arabidopsis thaliana] >gi|332007890|gb|AED95273.1| YEATS family protein [Arabidopsis thaliana]	--	--	--
Unigene10400	1086	21.565	39.7164	925.243	626.802	628.385	gi|38016521|gb|AAR07596.1|	4e-73	fiber protein Fb34 [Gossypium barbadense]	--	--	--
Unigene10555	1900	2.29323	1.99132	18.8642	27.6544	48.6164	gi|359478041|ref|XP_003632058.1|	2e-180	PREDICTED: probable pectinesterase/pectinesterase inhibitor 35-like [Vitis vinifera]	sp|Q9LYT5|PME35_ARATH	9e-164	Probable pectinesterase/pectinesterase inhibitor 35 OS=Arabidopsis thaliana GN=PME35 PE=2 SV=1
Unigene1091	928	21.1283	20.3853	12.7855	9.90215	16.5459	gi|225452194|ref|XP_002270874.1|	1e-83	PREDICTED: F-box protein SKIP14 [Vitis vinifera]	sp|Q9LU91|SKI14_ARATH	3e-50	F-box protein SKIP14 OS=Arabidopsis thaliana GN=SKIP14 PE=1 SV=1
Unigene10922	873	22.4594	31.4931	62.5753	65.3151	58.3485	gi|239586196|gb|ACN41352.2|	8e-13	protein phosphatase 2A regulatory subunit A [Betula pendula]	sp|Q38950|2AAB_ARATH	9e-80	Serine/threonine-protein phosphatase 2A 65 kDa regulatory subunit A beta isoform OS=Arabidopsis thaliana GN=PP2AA2 PE=1 SV=2
Unigene10985	901	21.7615	85.1044	1258.7	930.452	857.225	gi|357454141|ref|XP_003597351.1|	2e-80	UDP-glucuronic acid decarboxylase [Medicago truncatula] >gi|355486399|gb|AES67602.1| UDP-glucuronic acid decarboxylase [Medicago truncatula]	sp|Q2R1V8|GME2_ORYSJ	2e-16	GDP-mannose 3,5-epimerase 2 OS=Oryza sativa subsp. japonica GN=GME-2 PE=2 SV=2
Unigene10997	1014	23.6334	23.1339	7.55699	13.4773	13.4601	gi|255568681|ref|XP_002525312.1|	1e-29	conserved hypothetical protein [Ricinus communis] >gi|223535371|gb|EEF37045.1| conserved hypothetical protein [Ricinus communis]	--	--	--
Unigene11010	1989	50.521	341.004	1936.23	1952.96	1597.62	gi|255563608|ref|XP_002522806.1|	0	serine hydroxymethyltransferase, putative [Ricinus communis] >gi|223538044|gb|EEF39657.1| serine hydroxymethyltransferase, putative [Ricinus communis]	sp|P34899|GLYM_PEA	2e-156	Serine hydroxymethyltransferase, mitochondrial OS=Pisum sativum PE=1 SV=1
Unigene1116.2	1816	90.1238	170.563	741.015	1214.17	1194.19	gi|225457963|ref|XP_002275306.1|	0	PREDICTED: tubulin beta-1 chain [Vitis vinifera]	sp|P12411|TBB1_ARATH	0	Tubulin beta-1 chain OS=Arabidopsis thaliana GN=TUBB1 PE=2 SV=1
Unigene11383	2627	3.31719	22.2757	333.942	359.933	318.78	gi|225434508|ref|XP_002278392.1|	0	PREDICTED: probable LRR receptor-like serine/threonine-protein kinase At5g45840-like [Vitis vinifera]	sp|C0LGQ4|MRH1_ARATH	8e-153	Probable LRR receptor-like serine/threonine-protein kinase MRH1 OS=Arabidopsis thaliana GN=MRH1 PE=2 SV=1
Unigene11469	1832	1.78376	29.6017	499.365	605.771	679.419	gi|60657598|gb|AAX33320.1|	0	secondary cell wall-related glycosyltransferase family 47 [Populus tremula x Populus tremuloides]	sp|Q9FZJ1|IRX10_ARATH	0	Probable beta-1,4-xylosyltransferase IRX10 OS=Arabidopsis thaliana GN=IRX10 PE=2 SV=1
Unigene11574	2818	28.9909	27.5685	17.1048	12.0402	9.68667	gi|224112851|ref|XP_002316309.1|	2e-23	multidrug/pheromone exporter, MDR family, ABC transporter family [Populus trichocarpa] >gi|222865349|gb|EEF02480.1| multidrug/pheromone exporter, MDR family, ABC transporter family [Populus trichocarpa]	sp|Q8LPT1|AB6B_ARATH	0	ABC transporter B family member 6 OS=Arabidopsis thaliana GN=ABCB6 PE=1 SV=2
Unigene11718	789	2.41603	2.5575	6.57911	5.07674	5.25133	gi|356508270|ref|XP_003522881.1|	1e-116	PREDICTED: 8-amino-7-oxononanoate synthase-like [Glycine max]	--	--	--
Unigene11856	2639	33.0211	84.97	327.272	579.81	525.589	gi|224117802|ref|XP_002331635.1|	0	methylenetetrahydrofolate reductase [Populus trichocarpa] >gi|222874031|gb|EEF11162.1| methylenetetrahydrofolate reductase [Populus trichocarpa]	sp|O80585|MTHR2_ARATH	0	Methylenetetrahydrofolate reductase 2 OS=Arabidopsis thaliana GN=MTHFR2 PE=1 SV=2
Unigene12638	353	3.08579	2.85817	9.10319	7.34228	6.21391	gi|356536234|ref|XP_003536644.1|	4e-22	PREDICTED: tetratricopeptide repeat protein 5-like [Glycine max]	--	--	--
Unigene1283.3	1100	14.3587	38.9816	59.5495	92.3203	93.5012	gi|55419648|gb|AAV51937.1|	7e-81	AP2/EREBP transcription factor ERF-2 [Gossypium hirsutum]	sp|P42736|RAP23_ARATH	1e-46	Ethylene-responsive transcription factor RAP2-3 OS=Arabidopsis thaliana GN=RAP2-3 PE=1 SV=2
Unigene12841	2764	55.6661	51.8339	30.8536	15.7705	14.2848	gi|255547049|ref|XP_002514582.1|	0	inositol or phosphatidylinositol kinase, putative [Ricinus communis] >gi|223546186|gb|EEF47688.1| inositol or phosphatidylinositol kinase, putative [Ricinus communis]	sp|Q9C671|P4K2B_ARATH	0	Probable phosphatidylinositol 4-kinase type 2-beta At1g26270 OS=Arabidopsis thaliana GN=At1g26270 PE=1 SV=1
Unigene13135	2511	4.12114	23.807	137.424	139.064	107.836	gi|359473574|ref|XP_002265151.2|	0	PREDICTED: probable inactive leucine-rich repeat receptor-like protein kinase At1g66830-like [Vitis vinifera]	sp|Q9C9N5|Y1668_ARATH	9e-143	Probable inactive leucine-rich repeat receptor-like protein kinase At1g66830 OS=Arabidopsis thaliana GN=At1g66830 PE=1 SV=1
Unigene13166	1074	13.185	22.546	66.0545	71.9585	52.194	gi|15241069|ref|NP_195804.1|	4e-23	OFP1 (OVATE FAMILY PROTEIN 1); protein binding / transcription repressor [Arabidopsis thaliana]	--	--	--
Unigene13262	1883	11.7143	11.9218	29.5364	32.5339	32.3584	gi|297847704|ref|XP_002891733.1|	0	map 4 kinase alpha1 [Arabidopsis lyrata subsp. lyrata] >gi|297337575|gb|EFH67992.1| map 4 kinase alpha1 [Arabidopsis lyrata subsp. lyrata]	sp|Q39008|M3K1_ARATH	8e-35	Mitogen-activated protein kinase kinase kinase 1 OS=Arabidopsis thaliana GN=MEKK1 PE=1 SV=2
Unigene13285	1822	1.1957	43.4695	614.575	833.853	897.443	gi|255563827|ref|XP_002522914.1|	2e-177	Aspartic proteinase nepenthesin-1 precursor, putative [Ricinus communis] >gi|223537841|gb|EEF39457.1| Aspartic proteinase nepenthesin-1 precursor, putative [Ricinus communis]	sp|Q766C3|NEP1_NEPGR	1e-133	Aspartic proteinase nepenthesin-1 OS=Nepenthes gracilis GN=nep1 PE=1 SV=1
Unigene13423	1523	0.536416	0.828082	6.6544	4.79595	4.16074	gi|255587508|ref|XP_002534296.1|	3e-121	2,4-dihydroxyhept-2-ene-1,7-dioic acid aldolase, putative [Ricinus communis] >gi|223525555|gb|EEF28088.1| 2,4-dihydroxyhept-2-ene-1,7-dioic acid aldolase, putative [Ricinus communis]	sp|Q9LK03|PERK2_ARATH	5e-08	Proline-rich receptor-like protein kinase PERK2 OS=Arabidopsis thaliana GN=PERK2 PE=2 SV=3
Unigene13694	349	0.001	30.3548	166.444	282.879	87.2935	gi|224133914|ref|XP_002327710.1|	6e-17	glycosyltransferase, CAZy family GT8 [Populus trichocarpa] >gi|222836795|gb|EEE75188.1| glycosyltransferase, CAZy family GT8 [Populus trichocarpa]	sp|Q9LN68|GATL1_ARATH	5e-15	Probable galacturonosyltransferase-like 1 OS=Arabidopsis thaliana GN=GATL1 PE=2 SV=1
Unigene13842	862	39.4897	58.5229	94.0571	136.944	139.392	gi|224125716|ref|XP_002329700.1|	4e-59	predicted protein [Populus trichocarpa] >gi|222870608|gb|EEF07739.1| predicted protein [Populus trichocarpa]	--	--	--
Unigene13890	1466	30.2785	25.8084	87.8473	114.114	185.702	gi|255567721|ref|XP_002524839.1|	6e-124	carboxymethylenebutenolidase, putative [Ricinus communis] >gi|223535899|gb|EEF37559.1| carboxymethylenebutenolidase, putative [Ricinus communis]	sp|Q9SY75|PPR30_ARATH	1e-08	Putative pentatricopeptide repeat-containing protein At1g10330 OS=Arabidopsis thaliana GN=PCMP-E71 PE=3 SV=1
Unigene1414.1	871	0.001	0.579182	6.52732	8.11551	9.79371	gi|255564721|ref|XP_002523355.1|	2e-61	RING-H2 finger protein ATL3K, putative [Ricinus communis] >gi|223537443|gb|EEF39071.1| RING-H2 finger protein ATL3K, putative [Ricinus communis]	sp|Q9SKK8|ATL22_ARATH	4e-49	RING-H2 finger protein ATL22 OS=Arabidopsis thaliana GN=ATL22 PE=2 SV=2
Unigene14243	2980	0.001	0.0846422	1.99076	3.55803	3.5986	gi|224146039|ref|XP_002325856.1|	0	vitamin-b12 independent methionine synthase, 5-methyltetrahydropteroyltriglutamate-homocysteine [Populus trichocarpa] >gi|222862731|gb|EEF00238.1| vitamin-b12 independent methionine synthase, 5-methyltetrahydropteroyltriglutamate-homocysteine [Populus trichocarpa]	sp|Q42699|METE_CATRO	0	5-methyltetrahydropteroyltriglutamate--homocysteine methyltransferase OS=Catharanthus roseus GN=METE PE=2 SV=1
Unigene1426.1	439	9.92513	13.215	33.784	32.74	26.6486	gi|255540341|ref|XP_002511235.1|	4e-21	glyceraldehyde 3-phosphate dehydrogenase, putative [Ricinus communis] >gi|223550350|gb|EEF51837.1| glyceraldehyde 3-phosphate dehydrogenase, putative [Ricinus communis]	sp|P25861|G3PC_ANTMA	7e-22	Glyceraldehyde-3-phosphate dehydrogenase, cytosolic OS=Antirrhinum majus GN=GAPC PE=2 SV=1
Unigene1466.1	1852	3.97012	3.67727	0.40041	1.65392	1.7108	gi|255555749|ref|XP_002518910.1|	0	cystathionine gamma-synthase, putative [Ricinus communis] >gi|223541897|gb|EEF43443.1| cystathionine gamma-synthase, putative [Ricinus communis]	sp|P55217|METB_ARATH	9e-44	Cystathionine gamma-synthase, chloroplastic OS=Arabidopsis thaliana GN=CGS1 PE=2 SV=3
Unigene14761	4750	1.14661	2.12407	58.5442	42.0644	41.7152	gi|255586967|ref|XP_002534081.1|	0	DNA repair protein RAD50, putative [Ricinus communis] >gi|223525882|gb|EEF28304.1| DNA repair protein RAD50, putative [Ricinus communis]	sp|F4JJP1|Y4759_ARATH	4e-30	WEB family protein At4g27595, chloroplastic OS=Arabidopsis thaliana GN=At4g27595 PE=2 SV=1
Unigene14868	1487	0.001	2.54439	14.9609	23.4511	25.7327	gi|225457309|ref|XP_002281467.1|	0	PREDICTED: flavin-containing monooxygenase FMO GS-OX-like 9 [Vitis vinifera] >gi|147790550|emb|CAN76525.1| hypothetical protein VITISV_022813 [Vitis vinifera] >gi|297733920|emb|CBI15167.3| unnamed protein product [Vitis vinifera]	sp|Q9FF12|GSXL9_ARATH	0	Flavin-containing monooxygenase FMO GS-OX-like 9 OS=Arabidopsis thaliana GN=At5g07800 PE=2 SV=1
Unigene1492.1	1403	0.194099	0.539345	3.17132	4.03057	6.25377	gi|255540903|ref|XP_002511516.1|	3e-92	short chain alcohol dehydrogenase, putative [Ricinus communis] >gi|223550631|gb|EEF52118.1| short chain alcohol dehydrogenase, putative [Ricinus communis]	sp|Q7FAE1|MOMAS_ORYSJ	1e-53	Momilactone A synthase OS=Oryza sativa subsp. japonica GN=Os04g0179200 PE=2 SV=1
Unigene14933	639	0.426167	13.8156	147.77	139.381	113.661	gi|224133710|ref|XP_002327661.1|	2e-53	predicted protein [Populus trichocarpa] >gi|222836746|gb|EEE75139.1| predicted protein [Populus trichocarpa]	sp|O48822|Y2794_ARATH	1e-24	WEB family protein At2g17940 OS=Arabidopsis thaliana GN=At2g17940 PE=2 SV=1
Unigene15161	543	8.5257	8.36134	4.09702	0.867847	0.448846	gi|225437451|ref|XP_002268905.1|	6e-80	PREDICTED: probable ATP-dependent RNA helicase DHX37-like [Vitis vinifera]	sp|O22899|DHX15_ARATH	5e-28	Probable pre-mRNA-splicing factor ATP-dependent RNA helicase OS=Arabidopsis thaliana GN=At2g47250 PE=2 SV=1
Unigene1548.2	838	0.001	0.300995	3.53966	4.21755	5.52595	gi|255540963|ref|XP_002511546.1|	1e-36	zinc finger protein, putative [Ricinus communis] >gi|223550661|gb|EEF52148.1| zinc finger protein, putative [Ricinus communis]	sp|Q9SPL2|CIP8_ARATH	3e-14	E3 ubiquitin-protein ligase CIP8 OS=Arabidopsis thaliana GN=CIP8 PE=1 SV=1
Unigene1564.1	3196	5.79406	10.102	25.755	33.5442	37.9769	gi|359494115|ref|XP_002281360.2|	0	PREDICTED: microtubule-associated protein TORTIFOLIA1-like [Vitis vinifera]	sp|Q9T041|MAPT_ARATH	0	Microtubule-associated protein TORTIFOLIA1 OS=Arabidopsis thaliana GN=TOR1 PE=1 SV=2
Unigene15866	564	13.5195	12.5222	8.76548	7.10203	3.45707	gi|356545739|ref|XP_003541293.1|	1e-71	PREDICTED: uncharacterized protein LOC100775655 [Glycine max]	--	--	--
Unigene16163	477	16.5562	12.691	1.55463	1.97585	4.59856	gi|356532946|ref|XP_003535030.1|	2e-64	PREDICTED: phytochrome E-like [Glycine max]	sp|P55004|PHYE_IPONI	2e-62	Phytochrome E OS=Ipomoea nil GN=PHYE PE=2 SV=1
Unigene1623	1825	3.73042	3.59347	21.6712	37.6993	15.7586	gi|255538566|ref|XP_002510348.1|	1e-121	DNA-3-methyladenine glycosylase, putative [Ricinus communis] >gi|223551049|gb|EEF52535.1| DNA-3-methyladenine glycosylase, putative [Ricinus communis]	--	--	--
Unigene163	2518	104.797	189.025	1244.38	1394.35	2363.19	gi|359494619|ref|XP_003634816.1|	1e-106	PREDICTED: protein strawberry notch-like [Vitis vinifera]	sp|P33629|TBA_PRUDU	--	Tubulin alpha chain OS=Prunus dulcis GN=TUBA PE=2 SV=1
Unigene16349	603	7.67737	7.52937	5.73899	5.07971	3.63766	gi|225428065|ref|XP_002279626.1|	1e-75	PREDICTED: trafficking protein particle complex subunit 2-like protein [Vitis vinifera] >gi|297744593|emb|CBI37855.3| unnamed protein product [Vitis vinifera]	--	--	--
Unigene1637	777	13.3181	16.5559	38.1755	33.9633	28.8579	gi|6723478|emb|CAB66336.1|	0	alpha-tubulin [Betula pendula]	--	0	--
Unigene16712	386	14.1099	13.7226	7.04418	5.49374	5.05126	gi|357521311|ref|XP_003630944.1|	3e-56	Nuclear pore complex protein Nup155 [Medicago truncatula] >gi|355524966|gb|AET05420.1| Nuclear pore complex protein Nup155 [Medicago truncatula]	--	--	--
Unigene16718	272	10.0118	10.2006	6.36142	4.33126	0.896042	gi|255565329|ref|XP_002523656.1|	1e-40	chromodomain helicase DNA binding protein, putative [Ricinus communis] >gi|223537108|gb|EEF38742.1| chromodomain helicase DNA binding protein, putative [Ricinus communis]	sp|Q9SGH2|MBD9_ARATH	7e-09	Methyl-CpG-binding domain-containing protein 9 OS=Arabidopsis thaliana GN=MBD9 PE=2 SV=1
Unigene16836	313	19.1408	16.923	5.52813	2.25834	0.778669	gi|357478579|ref|XP_003609575.1|	5e-18	Helicase swr1 [Medicago truncatula] >gi|355510630|gb|AES91772.1| Helicase swr1 [Medicago truncatula]	--	--	--
Unigene17006	291	14.0372	13.0017	5.94607	3.23877	1.67508	gi|357474041|ref|XP_003607305.1|	1e-10	Chromodomain helicase DNA binding protein [Medicago truncatula] >gi|355508360|gb|AES89502.1| Chromodomain helicase DNA binding protein [Medicago truncatula]	--	--	--
Unigene1706.1	425	12.1743	10.0894	6.97939	3.3264	2.29387	gi|357462649|ref|XP_003601606.1|	3e-38	Mediator of RNA polymerase II transcription subunit [Medicago truncatula] >gi|355490654|gb|AES71857.1| Mediator of RNA polymerase II transcription subunit [Medicago truncatula]	sp|F4I096|MED13_ARATH	8e-31	Mediator of RNA polymerase II transcription subunit 13 OS=Arabidopsis thaliana GN=MED13 PE=1 SV=1
Unigene1711.2	1307	0.208356	0.001	1.70213	2.70414	4.28894	gi|359491675|ref|XP_003634302.1|	1e-87	PREDICTED: probable serine/threonine-protein kinase At1g54610-like [Vitis vinifera]	sp|Q9ZVM9|Y1461_ARATH	2e-35	Probable serine/threonine-protein kinase At1g54610 OS=Arabidopsis thaliana GN=At1g54610 PE=1 SV=1
Unigene17174	608	12.0932	11.616	6.50491	5.42547	4.00861	gi|357443889|ref|XP_003592222.1|	2e-70	Serine/threonine protein kinase [Medicago truncatula] >gi|355481270|gb|AES62473.1| Serine/threonine protein kinase [Medicago truncatula]	--	--	--
Unigene17237	380	16.4826	13.9392	5.20393	5.58048	7.05515	gi|359482107|ref|XP_002270537.2|	6e-54	PREDICTED: E3 ubiquitin-protein ligase UBR2-like [Vitis vinifera]	--	--	--
Unigene17479	269	21.2592	16.8781	11.9458	7.0073	5.43621	gi|124359679|gb|ABN06047.1|	3e-24	Zinc finger, RING-type; Transcription factor jumonji, jmjC; Zinc finger, C2H2-type [Medicago truncatula]	--	--	--
Unigene17537	303	1.7975	1.66491	7.34218	10.8867	4.02184	gi|357461379|ref|XP_003600971.1|	3e-14	Multiple inositol polyphosphate phosphatase [Medicago truncatula] >gi|355490019|gb|AES71222.1| Multiple inositol polyphosphate phosphatase [Medicago truncatula]	--	--	--
Unigene1763	1253	81.2833	109.711	469.714	608.89	1006.99	gi|255537241|ref|XP_002509687.1|	3e-157	NAD dependent epimerase/dehydratase, putative [Ricinus communis] >gi|223549586|gb|EEF51074.1| NAD dependent epimerase/dehydratase, putative [Ricinus communis]	sp|Q9SYM5|RHM1_ARATH	5e-139	Probable rhamnose biosynthetic enzyme 1 OS=Arabidopsis thaliana GN=RHM1 PE=1 SV=1
Unigene1766.4	534	15.2989	25.5068	84.2471	125.752	133.728	gi|357485863|ref|XP_003613219.1|	9e-55	ADP-ribosylation factor [Medicago truncatula] >gi|355514554|gb|AES96177.1| ADP-ribosylation factor [Medicago truncatula]	sp|P51823|ARF2_ORYSJ	4e-56	ADP-ribosylation factor 2 OS=Oryza sativa subsp. japonica GN=ARF PE=2 SV=2
Unigene17700	583	0.001	1.73059	2.96793	4.84982	5.01661	gi|297817792|ref|XP_002876779.1|	5e-44	zinc ion binding protein [Arabidopsis lyrata subsp. lyrata] >gi|297322617|gb|EFH53038.1| zinc ion binding protein [Arabidopsis lyrata subsp. lyrata]	--	--	--
Unigene1801.2	298	2.74148	5.07853	8.29485	11.0694	11.4501	gi|142942419|gb|ABO92994.1|	1e-07	F-box domain-containing protein [Solanum tuberosum]	sp|Q9LIR8|FBK67_ARATH	2e-06	F-box/kelch-repeat protein At3g23880 OS=Arabidopsis thaliana GN=At3g23880 PE=2 SV=1
Unigene18171	366	2.97618	3.44582	7.4291	8.36903	9.32275	gi|356527630|ref|XP_003532411.1|	7e-18	PREDICTED: uncharacterized protein LOC100811734 [Glycine max]	--	--	--
Unigene1819	545	0.999342	2.31407	4.08198	6.48496	6.26079	gi|255563208|ref|XP_002522607.1|	1e-40	DNA-directed RNA polymerase II 19 kD polypeptide rpb7, putative [Ricinus communis] >gi|223538083|gb|EEF39694.1| DNA-directed RNA polymerase II 19 kD polypeptide rpb7, putative [Ricinus communis]	sp|P46279|RPB7_SOYBN	7e-10	DNA-directed RNA polymerase II subunit RPB7 OS=Glycine max PE=2 SV=1
Unigene1836.1	2254	0.966533	1.00714	1.53532	2.09069	1.29755	gi|79494763|ref|NP_195002.2|	0	ENTH/VHS/GAT family protein [Arabidopsis thaliana] >gi|332660714|gb|AEE86114.1| ENTH/VHS/GAT family protein [Arabidopsis thaliana]	sp|P08489|GLT4_WHEAT	1e-06	Glutenin, high molecular weight subunit PW212 OS=Triticum aestivum PE=3 SV=1
Unigene18439	398	13.6845	12.0413	3.10536	6.51212	6.73608	gi|255563544|ref|XP_002522774.1|	2e-60	E3 ubiquitin protein ligase upl2, putative [Ricinus communis] >gi|223538012|gb|EEF39625.1| E3 ubiquitin protein ligase upl2, putative [Ricinus communis]	sp|Q8H0T4|UPL2_ARATH	5e-50	E3 ubiquitin-protein ligase UPL2 OS=Arabidopsis thaliana GN=UPL2 PE=1 SV=3
Unigene18577	628	13.8762	12.8527	8.26579	4.12711	3.49285	gi|334187637|ref|NP_568273.2|	1e-32	PHD-finger and DNA binding domain-containing protein [Arabidopsis thaliana] >gi|332004422|gb|AED91805.1| PHD-finger and DNA binding domain-containing protein [Arabidopsis thaliana]	--	--	--
Unigene18618	843	29.0734	20.6455	15.5408	6.70805	5.78229	gi|255585406|ref|XP_002533398.1|	6e-134	androgen induced inhibitor of proliferation (as3) / pds5, putative [Ricinus communis] >gi|223526757|gb|EEF28984.1| androgen induced inhibitor of proliferation (as3) / pds5, putative [Ricinus communis]	--	--	--
Unigene18620	631	17.6944	15.5897	7.44302	5.60112	3.09	gi|255585406|ref|XP_002533398.1|	4e-77	androgen induced inhibitor of proliferation (as3) / pds5, putative [Ricinus communis] >gi|223526757|gb|EEF28984.1| androgen induced inhibitor of proliferation (as3) / pds5, putative [Ricinus communis]	--	--	--
Unigene18641	722	0.001	0.349354	6.50491	4.56882	4.38837	gi|224127929|ref|XP_002329212.1|	1e-62	GRAS family transcription factor [Populus trichocarpa] >gi|222870993|gb|EEF08124.1| GRAS family transcription factor [Populus trichocarpa]	sp|Q9SLH3|RGA_ARATH	2e-24	DELLA protein RGA OS=Arabidopsis thaliana GN=RGA PE=1 SV=1
Unigene18728	361	12.824	11.878	8.21673	4.56882	5.40107	gi|297848576|ref|XP_002892169.1|	4e-25	pentatricopeptide repeat-containing protein [Arabidopsis lyrata subsp. lyrata] >gi|297338011|gb|EFH68428.1| pentatricopeptide repeat-containing protein [Arabidopsis lyrata subsp. lyrata]	sp|Q9LR67|PPR9_ARATH	2e-26	Pentatricopeptide repeat-containing protein At1g03560, mitochondrial OS=Arabidopsis thaliana GN=At1g03560 PE=2 SV=1
Unigene18971	473	12.0904	11.7318	2.09037	5.97768	4.63744	gi|224066963|ref|XP_002302301.1|	1e-34	methyl binding domain protein [Populus trichocarpa] >gi|222844027|gb|EEE81574.1| methyl binding domain protein [Populus trichocarpa]	sp|Q9LME6|MBD8_ARATH	1e-27	Methyl-CpG-binding domain-containing protein 8 OS=Arabidopsis thaliana GN=MBD8 PE=2 SV=1
Unigene19279	1460	0.186521	0.518289	6.77224	4.51875	3.67255	gi|255538230|ref|XP_002510180.1|	4e-130	conserved hypothetical protein [Ricinus communis] >gi|223550881|gb|EEF52367.1| conserved hypothetical protein [Ricinus communis]	--	--	--
Unigene19360	779	10.4873	9.71375	5.39432	4.23451	3.12867	gi|356544844|ref|XP_003540857.1|	6e-91	PREDICTED: probable histone-lysine N-methyltransferase ATXR3-like [Glycine max]	sp|O23372|ATXR3_ARATH	5e-58	Probable histone-lysine N-methyltransferase ATXR3 OS=Arabidopsis thaliana GN=ATXR3 PE=1 SV=2
Unigene19576	537	0.001	6.57593	57.5388	57.4791	75.7948	gi|297826449|ref|XP_002881107.1|	1e-30	ATOFP17/OFP17 [Arabidopsis lyrata subsp. lyrata] >gi|297326946|gb|EFH57366.1| ATOFP17/OFP17 [Arabidopsis lyrata subsp. lyrata]	--	--	--
Unigene1962.2	2065	0.527498	0.488588	1.19703	1.59743	2.24249	gi|255561260|ref|XP_002521641.1|	1e-119	adenosine diphosphatase, putative [Ricinus communis] >gi|223539153|gb|EEF40748.1| adenosine diphosphatase, putative [Ricinus communis]	sp|P52914|NTPA_PEA	2e-27	Nucleoside-triphosphatase OS=Pisum sativum PE=2 SV=1
Unigene19827	272	17.02	15.7646	9.99652	3.465	5.37625	gi|356533577|ref|XP_003535339.1|	5e-18	PREDICTED: protein ALWAYS EARLY 2-like [Glycine max]	sp|Q6A333|ALY2_ARATH	4e-13	Protein ALWAYS EARLY 2 OS=Arabidopsis thaliana GN=ALY2 PE=1 SV=1
Unigene19835	288	9.45558	9.63393	5.14972	1.63625	2.53879	gi|302398749|gb|ADL36669.1|	6e-06	COL domain class transcription factor [Malus x domestica]	sp|Q9C7E8|COL15_ARATH	1e-06	Zinc finger protein CONSTANS-LIKE 15 OS=Arabidopsis thaliana GN=COL15 PE=2 SV=1
Unigene19877	216	5.04298	4.671	18.3101	11.9992	13.5402	gi|297807503|ref|XP_002871635.1|	2e-07	NHL repeat-containing protein [Arabidopsis lyrata subsp. lyrata] >gi|297317472|gb|EFH47894.1| NHL repeat-containing protein [Arabidopsis lyrata subsp. lyrata]	--	--	--
Unigene20087	1582	0.172137	0.956639	5.93748	3.57452	4.31369	gi|225425507|ref|XP_002263966.1|	0	PREDICTED: transcription factor ABORTED MICROSPORES-like [Vitis vinifera]	sp|Q9ZVX2|AMS_ARATH	5e-127	Transcription factor ABORTED MICROSPORES OS=Arabidopsis thaliana GN=AMS PE=1 SV=2
Unigene20373	596	0.913828	1.26963	6.63588	7.90672	3.27146	gi|356567502|ref|XP_003551958.1|	2e-25	PREDICTED: oxysterol-binding protein-related protein 1D-like isoform 4 [Glycine max]	sp|Q9SAF0|ORP1D_ARATH	1e-10	Oxysterol-binding protein-related protein 1D OS=Arabidopsis thaliana GN=ORP1D PE=2 SV=1
Unigene20429	1480	11.04	11.4187	7.18177	3.50246	4.28163	gi|297839985|ref|XP_002887874.1|	1e-73	DNA binding protein [Arabidopsis lyrata subsp. lyrata] >gi|297333715|gb|EFH64133.1| DNA binding protein [Arabidopsis lyrata subsp. lyrata]	--	--	--
Unigene2223.3	1496	0.910163	13.4884	100.461	75.6001	58.3242	gi|350534726|ref|NP_001234668.1|	4e-163	galactinol synthase [Solanum lycopersicum] >gi|256542214|dbj|BAH98060.1| galactinol synthase [Solanum lycopersicum]	sp|Q9LSB1|GUX1_ARATH	4e-13	UDP-glucuronate:xylan alpha-glucuronosyltransferase 1 OS=Arabidopsis thaliana GN=GUX1 PE=2 SV=1
Unigene22311	521	0.522689	0.484134	5.69336	8.14043	8.88819	gi|255554088|ref|XP_002518084.1|	2e-51	er lumen protein retaining receptor, putative [Ricinus communis] >gi|223542680|gb|EEF44217.1| er lumen protein retaining receptor, putative [Ricinus communis]	sp|Q9ZTN2|ERD2_PETHY	5e-51	ER lumen protein retaining receptor OS=Petunia hybrida GN=ERD2 PE=2 SV=1
Unigene2238.2	1246	1.09278	1.21461	2.77738	2.83652	2.73847	gi|225447131|ref|XP_002274696.1|	7e-152	PREDICTED: uncharacterized protein LOC100244748 [Vitis vinifera]	--	--	--
Unigene2242.1	1489	13.168	13.2131	8.96446	5.53842	5.72889	gi|296084244|emb|CBI24632.3|	1e-57	unnamed protein product [Vitis vinifera]	--	--	--
Unigene2299.1	2114	73.2973	70.0384	37.6509	29.5361	22.251	gi|255558438|ref|XP_002520244.1|	0	Transcriptional corepressor SEUSS, putative [Ricinus communis] >gi|223540463|gb|EEF42030.1| Transcriptional corepressor SEUSS, putative [Ricinus communis]	sp|Q8W234|SEUSS_ARATH	0	Transcriptional corepressor SEUSS OS=Arabidopsis thaliana GN=SEU PE=1 SV=1
Unigene2341	975	3.07234	3.10442	6.33812	8.45817	4.49951	gi|359480809|ref|XP_002277466.2|	1e-62	PREDICTED: B3 domain-containing protein Os01g0234100-like [Vitis vinifera]	sp|Q0JP99|Y1341_ORYSJ	2e-33	B3 domain-containing protein Os01g0234100 OS=Oryza sativa subsp. japonica GN=Os01g0234100 PE=2 SV=1
Unigene2391.1	936	181.256	185.672	419.9	321.461	335.12	gi|313586525|gb|ADR71273.1|	3e-122	60S ribosomal protein L10B [Hevea brasiliensis]	sp|Q9SPB3|RL10_VITRI	6e-121	60S ribosomal protein L10 OS=Vitis riparia GN=RPL10 PE=2 SV=1
Unigene2402.2	1690	45.6016	40.7455	145.972	101.08	115.084	gi|225425595|ref|XP_002262914.1|	0	PREDICTED: ATP-citrate synthase alpha chain protein 1 [Vitis vinifera]	sp|Q9SGY2|ACLA1_ARATH	0	ATP-citrate synthase alpha chain protein 1 OS=Arabidopsis thaliana GN=ACLA-1 PE=1 SV=1
Unigene2412	1156	30.3887	34.2567	81.0413	84.5869	89.1825	gi|359475302|ref|XP_003631644.1|	3e-113	PREDICTED: ras-related protein Rab7-like [Vitis vinifera] >gi|147783576|emb|CAN61313.1| hypothetical protein VITISV_013388 [Vitis vinifera]	sp|P31022|RAB7_PEA	7e-112	Ras-related protein Rab7 OS=Pisum sativum PE=2 SV=1
Unigene2515.1	1641	0.001	1.22966	21.9922	28.5731	27.625	gi|224056557|ref|XP_002298909.1|	0	predicted protein [Populus trichocarpa] >gi|222846167|gb|EEE83714.1| predicted protein [Populus trichocarpa]	--	--	--
Unigene2567	347	38.4545	50.156	108.278	87.5937	77.9634	gi|255540217|ref|XP_002511173.1|	6e-11	sec61 gamma subunit, putative [Ricinus communis] >gi|223550288|gb|EEF51775.1| sec61 gamma subunit, putative [Ricinus communis]	sp|Q9SMP2|S61G3_ARATH	1e-11	Protein transport protein Sec61 subunit gamma-3 OS=Arabidopsis thaliana GN=SEC61G3 PE=2 SV=1
Unigene26041	353	0.001	1.42909	8.40294	8.00976	6.90435	gi|313586451|gb|ADR71236.1|	1e-09	60S acidic ribosomal protein P0B [Hevea brasiliensis]	sp|P50346|RLA0_SOYBN	1e-08	60S acidic ribosomal protein P0 OS=Glycine max PE=2 SV=1
Unigene2632	378	23.0536	18.684	47.0832	60.4634	30.3042	gi|356548648|ref|XP_003542712.1|	4e-17	PREDICTED: ras-related protein RABA1f-like [Glycine max]	sp|O49513|RAA1E_ARATH	6e-18	Ras-related protein RABA1e OS=Arabidopsis thaliana GN=RABA1E PE=2 SV=1
Unigene266	2203	28.1839	30.4558	62.0491	51.0172	49.4527	gi|359481081|ref|XP_002265256.2|	2e-38	PREDICTED: nucleolar GTP-binding protein 1-like [Vitis vinifera]	sp|Q9M651|RAGP2_ARATH	--	RAN GTPase-activating protein 2 OS=Arabidopsis thaliana GN=RANGAP2 PE=1 SV=2
Unigene2665	400	14.2968	10.7199	8.65153	3.5343	2.43723	gi|255571275|ref|XP_002526587.1|	1e-149	conserved hypothetical protein [Ricinus communis] >gi|223534081|gb|EEF35799.1| conserved hypothetical protein [Ricinus communis]	--	3e-10	--
Unigene2666	1298	2.3078	3.49785	20.948	27.0473	30.2307	gi|356536033|ref|XP_003536545.1|	0	PREDICTED: RAN GTPase-activating protein 2-like isoform 1 [Glycine max] >gi|356536035|ref|XP_003536546.1| PREDICTED: RAN GTPase-activating protein 2-like isoform 2 [Glycine max]	sp|Q9FPQ6|GP1_CHLRE	0	Vegetative cell wall protein gp1 OS=Chlamydomonas reinhardtii GN=GP1 PE=2 SV=1
Unigene2691.1	1644	0.662581	0.767134	2.25535	2.72311	1.186	gi|356549749|ref|XP_003543253.1|	2e-149	PREDICTED: CBS domain-containing protein CBSX5-like [Glycine max]	sp|Q84WQ5|CBSX5_ARATH	8e-115	CBS domain-containing protein CBSX5 OS=Arabidopsis thaliana GN=CBSX5 PE=2 SV=2
Unigene2710.1	680	6.40755	7.41864	14.9039	15.5925	18.2793	gi|356563552|ref|XP_003550025.1|	5e-56	PREDICTED: 60S ribosomal protein L51, mitochondrial-like [Glycine max]	--	--	--
Unigene2753.1	328	8.30246	8.45906	6.02894	4.31013	1.48612	gi|359488845|ref|XP_002274643.2|	2e-39	PREDICTED: methyl-CpG-binding domain-containing protein 9-like [Vitis vinifera]	sp|Q9SGH2|MBD9_ARATH	7e-38	Methyl-CpG-binding domain-containing protein 9 OS=Arabidopsis thaliana GN=MBD9 PE=2 SV=1
Unigene2816	1432	5.13454	13.739	126.528	140.188	144.328	gi|56797970|emb|CAI39214.1|	4e-75	BCL-2 binding anthanogene-1 [Hordeum vulgare subsp. vulgare]	sp|Q8RX71|BAG4_ARATH	1e-62	BAG family molecular chaperone regulator 4 OS=Arabidopsis thaliana GN=BAG4 PE=1 SV=1
Unigene2831.1	944	0.001	1.33598	35.0879	43.1804	14.9745	gi|255577068|ref|XP_002529418.1|	3e-106	carbonic anhydrase, putative [Ricinus communis] >gi|223531095|gb|EEF32944.1| carbonic anhydrase, putative [Ricinus communis]	sp|Q84UV8|NEC3_NICLS	2e-77	Bifunctional monodehydroascorbate reductase and carbonic anhydrase nectarin-3 OS=Nicotiana langsdorffii x Nicotiana sanderae GN=NEC3 PE=1 SV=1
Unigene2863	3052	46.8442	45.207	20.6529	15.2088	12.7771	gi|359485142|ref|XP_002279792.2|	0	PREDICTED: protein MEI2-like 2-like [Vitis vinifera]	sp|Q6ZI17|OML2_ORYSJ	0	Protein MEI2-like 2 OS=Oryza sativa subsp. japonica GN=ML2 PE=2 SV=1
Unigene2887.4	1610	7.27316	52.3268	917.2	1370.84	1369.7	gi|255556894|ref|XP_002519480.1|	0	s-adenosylmethionine synthetase, putative [Ricinus communis] >gi|223541343|gb|EEF42894.1| s-adenosylmethionine synthetase, putative [Ricinus communis]	sp|P50302|METK2_ACTCH	0	S-adenosylmethionine synthase 2 OS=Actinidia chinensis GN=SAM2 PE=2 SV=1
Unigene2934.2	2586	99.6193	102.513	268.885	318.625	306.492	gi|356549610|ref|XP_003543185.1|	0	PREDICTED: probable rhamnose biosynthetic enzyme 1-like [Glycine max]	sp|Q9SYM5|RHM1_ARATH	0	Probable rhamnose biosynthetic enzyme 1 OS=Arabidopsis thaliana GN=RHM1 PE=1 SV=1
Unigene2965.2	567	9.12539	7.56256	6.10337	3.74001	3.86863	gi|356576201|ref|XP_003556222.1|	9e-49	PREDICTED: RNA pseudourine synthase 5-like [Glycine max]	sp|Q0DST9|PUS5_ORYSJ	1e-41	RNA pseudourine synthase 5 OS=Oryza sativa subsp. japonica GN=Os03g0288500 PE=2 SV=2
Unigene3087	1234	9.4893	51.3053	202.316	193.995	123.442	gi|225544596|gb|ACN91625.1|	3e-91	transcription factor MYBL1 [Populus x canadensis]	sp|Q50EX6|ODO1_PETHY	2e-76	Protein ODORANT1 OS=Petunia hybrida GN=ODO1 PE=2 SV=1
Unigene3094.1	2119	56.8031	59.3981	37.3288	22.5724	51.7582	gi|15237740|ref|NP_200680.1|	2e-112	smr (Small MutS Related) domain-containing protein [Arabidopsis thaliana] >gi|8843792|dbj|BAA97340.1| PRL1 associated protein-like [Arabidopsis thaliana] >gi|17065352|gb|AAL32830.1| PRL1 associated protein-like [Arabidopsis thaliana] >gi|21387179|gb|AAM47993.1| PRL1-associated protein-like protein [Arabidopsis thaliana] >gi|332009706|gb|AED97089.1| smr (Small MutS Related) domain-containing prote…	--	--	--
Unigene3185.2	1315	95.4676	83.6304	40.9785	10.034	10.0084	gi|357503955|ref|XP_003622266.1|	1e-59	CONSTANS-like zinc finger protein [Medicago truncatula] >gi|355497281|gb|AES78484.1| CONSTANS-like zinc finger protein [Medicago truncatula]	sp|Q8RWD0|COL16_ARATH	1e-18	Zinc finger protein CONSTANS-LIKE 16 OS=Arabidopsis thaliana GN=COL16 PE=2 SV=2
Unigene3201.1	1224	3.33726	3.50325	7.87604	9.81751	10.1551	gi|224102077|ref|XP_002312536.1|	6e-73	predicted protein [Populus trichocarpa] >gi|222852356|gb|EEE89903.1| predicted protein [Populus trichocarpa]	--	--	--
Unigene3214	877	0.621028	2.01327	12.1198	14.508	23.3441	gi|255551685|ref|XP_002516888.1|	2e-107	serine/threonine protein kinase, putative [Ricinus communis] >gi|223543976|gb|EEF45502.1| serine/threonine protein kinase, putative [Ricinus communis]	sp|Q9LMN7|WAK5_ARATH	1e-36	Wall-associated receptor kinase 5 OS=Arabidopsis thaliana GN=WAK5 PE=2 SV=1
Unigene3275.1	897	1.82154	1.96838	5.23584	5.77887	9.78154	gi|224135679|ref|XP_002327278.1|	2e-32	predicted protein [Populus trichocarpa] >gi|222835648|gb|EEE74083.1| predicted protein [Populus trichocarpa]	--	--	--
Unigene3323	2106	39.3094	48.267	86.5036	123.069	118.969	gi|225445031|ref|XP_002280190.1|	0	PREDICTED: gamma-glutamyltranspeptidase 1 [Vitis vinifera] >gi|297738725|emb|CBI27970.3| unnamed protein product [Vitis vinifera]	--	--	--
Unigene3428	1048	24.1659	24.3088	13.916	9.4428	7.90706	gi|225431869|ref|XP_002275498.1|	2e-52	PREDICTED: GATA transcription factor 16 [Vitis vinifera] >gi|296083288|emb|CBI22924.3| unnamed protein product [Vitis vinifera]	sp|Q9LIB5|GAT17_ARATH	3e-21	GATA transcription factor 17 OS=Arabidopsis thaliana GN=GATA17 PE=2 SV=1
Unigene3445.2	2443	0.445879	0.516238	1.31536	1.06092	0.897876	gi|346995771|gb|ABJ90469.2|	0	beta-ketoacyl-ACP synthase II [Jatropha curcas]	sp|Q9C9P4|KASC2_ARATH	0	3-oxoacyl-[acyl-carrier-protein] synthase II, chloroplastic OS=Arabidopsis thaliana GN=KAS2 PE=1 SV=1
Unigene3548.2	849	8.33962	13.0722	42.7991	49.6773	59.1367	gi|351727329|ref|NP_001236901.1|	6e-84	nonclathrin coat protein zeta2-COP [Glycine max] >gi|7363244|dbj|BAA93004.1| nonclathrin coat protein zeta2-COP [Glycine max]	sp|Q6Z844|COPZ2_ORYSJ	6e-78	Coatomer subunit zeta-2 OS=Oryza sativa subsp. japonica GN=COPZ2 PE=2 SV=1
Unigene3592	365	1.49217	2.07315	8.12668	9.03749	9.3483	gi|359474650|ref|XP_003631503.1|	4e-20	PREDICTED: UDP-glycosyltransferase 73C3-like [Vitis vinifera] >gi|147768453|emb|CAN78332.1| hypothetical protein VITISV_034975 [Vitis vinifera]	--	--	--
Unigene3600	592	3.68001	4.26071	68.4774	47.3629	46.9332	gi|48093459|gb|AAT40106.1|	2e-28	putative UDP-glucose dehydrogenase 2 [Nicotiana tabacum]	sp|Q96558|UGDH_SOYBN	1e-28	UDP-glucose 6-dehydrogenase OS=Glycine max PE=2 SV=1
Unigene3633.1	2281	0.001	1.87987	20.6982	24.688	48.1891	gi|224106812|ref|XP_002314293.1|	0	predicted protein [Populus trichocarpa] >gi|222850701|gb|EEE88248.1| predicted protein [Populus trichocarpa]	--	--	--
Unigene3636	520	7.85541	7.27597	5.22895	2.7187	3.28089	gi|225424889|ref|XP_002269566.1|	5e-74	PREDICTED: E3 ubiquitin-protein ligase HERC2-like [Vitis vinifera]	--	--	--
Unigene3728.1	1488	0.183011	0.001	6.31256	7.12561	6.55171	gi|225449018|ref|XP_002272669.1|	0	PREDICTED: adenosine kinase 2 [Vitis vinifera]	sp|Q9LZG0|ADK2_ARATH	5e-173	Adenosine kinase 2 OS=Arabidopsis thaliana GN=ADK2 PE=1 SV=1
Unigene373.1	716	0.760673	1.05685	35.2137	40.8058	41.5283	gi|356521406|ref|XP_003529347.1|	8e-41	PREDICTED: uncharacterized protein LOC100793283 [Glycine max]	--	--	--
Unigene3913.2	580	8.92085	10.8721	37.5042	47.5303	44.9628	gi|147778492|emb|CAN69916.1|	3e-22	hypothetical protein VITISV_044272 [Vitis vinifera]	--	--	--
Unigene3986	2132	20.6923	43.7742	267.708	277.948	272.417	gi|350540010|ref|NP_001234609.1|	0	prephenate aminotransferase [Solanum lycopersicum] >gi|311700557|gb|ADQ00383.1| prephenate aminotransferase [Solanum lycopersicum]	sp|E9L7A5|PAT_PETHY	0	Bifunctional aspartate aminotransferase and glutamate/aspartate-prephenate aminotransferase OS=Petunia hybrida PE=1 SV=1
Unigene399	495	0.001	0.509563	16.4791	13.328	10.8322	gi|225444981|ref|XP_002282754.1|	1e-133	PREDICTED: uncharacterized protein LOC100249262 [Vitis vinifera]	sp|P93749|Y2197_ARATH	6e-53	Probable protein kinase At2g41970 OS=Arabidopsis thaliana GN=At2g41970 PE=2 SV=1
Unigene3990.1	1120	5.10601	13.5125	21.6288	37.0261	38.9522	gi|255587729|ref|XP_002534374.1|	3e-52	Serine/threonine-protein kinase PBS1, putative [Ricinus communis] >gi|223525414|gb|EEF28012.1| Serine/threonine-protein kinase PBS1, putative [Ricinus communis]	--	--	--
Unigene411.2	1408	8.70343	7.88231	2.9845	3.01219	4.50058	gi|354683205|gb|AER30501.1|	1e-138	hypersensitive induced reaction protein 1 [Glycine max]	sp|Q9FM19|HIR1_ARATH	2e-138	Hypersensitive-induced response protein 1 OS=Arabidopsis thaliana GN=HIR1 PE=1 SV=1
Unigene4153.2	559	57.9717	41.9638	24.7629	8.85157	4.79599	gi|255578767|ref|XP_002530241.1|	1e-08	conserved hypothetical protein [Ricinus communis] >gi|223530245|gb|EEF32147.1| conserved hypothetical protein [Ricinus communis]	--	--	--
Unigene4172.2	2525	2.157	1.59831	17.9149	18.663	17.857	gi|225446203|ref|XP_002263173.1|	0	PREDICTED: heparanase-like protein 3-like [Vitis vinifera]	sp|Q9FZP1|HPSE3_ARATH	0	Heparanase-like protein 3 OS=Arabidopsis thaliana GN=At5g34940 PE=2 SV=2
Unigene4172	1097	0.496483	73.5778	173.954	308.862	327.26	gi|190683713|gb|ACE82175.1|	9e-55	extensin-like protein [Glycine max]	sp|P14009|14KD_DAUCA	3e-46	14 kDa proline-rich protein DC2.15 OS=Daucus carota PE=2 SV=1
Unigene4192.3	1398	0.001	1.80425	24.0468	31.1801	37.4825	gi|359480853|ref|XP_002277922.2|	2e-171	PREDICTED: PI-PLC X domain-containing protein At5g67130-like [Vitis vinifera] >gi|296082409|emb|CBI21414.3| unnamed protein product [Vitis vinifera]	sp|Q93XX5|Y5713_ARATH	3e-117	PI-PLC X domain-containing protein At5g67130 OS=Arabidopsis thaliana GN=At5g67130 PE=1 SV=1
Unigene4200	1249	0.436062	52.3047	947.977	1020.58	1410.83	gi|186493960|ref|NP_177041.3|	1e-61	arabinogalactan protein 19 [Arabidopsis thaliana] >gi|378405147|sp|Q9S740.2|AGP19_ARATH RecName: Full=Lysine-rich arabinogalactan protein 19; Short=Lys-rich AGP 19; Flags: Precursor >gi|332196711|gb|AEE34832.1| arabinogalactan protein 19 [Arabidopsis thaliana]	sp|Q9S740|AGP19_ARATH	4e-63	Lysine-rich arabinogalactan protein 19 OS=Arabidopsis thaliana GN=AGP19 PE=2 SV=2
Unigene4234	611	4.90267	4.95385	12.1368	12.3402	12.3657	gi|225444928|ref|XP_002282217.1|	5e-37	PREDICTED: uncharacterized protein LOC100249113 [Vitis vinifera] >gi|297738671|emb|CBI27916.3| unnamed protein product [Vitis vinifera]	sp|Q7G6K7|FH3_ORYSJ	2e-06	Formin-like protein 3 OS=Oryza sativa subsp. japonica GN=FH3 PE=2 SV=2
Unigene4271.2	1215	50.4298	45.8796	19.5308	11.8295	9.22739	gi|255540443|ref|XP_002511286.1|	2e-116	ribonucleoprotein, chloroplast, putative [Ricinus communis] >gi|223550401|gb|EEF51888.1| ribonucleoprotein, chloroplast, putative [Ricinus communis]	sp|P19683|ROC4_NICSY	1e-103	31 kDa ribonucleoprotein, chloroplastic OS=Nicotiana sylvestris PE=1 SV=1
Unigene4271	728	1.1222	1.73237	4.0745	5.82578	3.01306	gi|225450201|ref|XP_002264792.1|	6e-103	PREDICTED: uncharacterized protein LOC100240969 [Vitis vinifera] >gi|297736215|emb|CBI24853.3| unnamed protein product [Vitis vinifera]	--	--	--
Unigene4276.1	1540	1.41465	1.80167	4.01277	4.28401	4.27307	gi|359477563|ref|XP_002283373.2|	0	PREDICTED: dymeclin-like [Vitis vinifera] >gi|297737110|emb|CBI26311.3| unnamed protein product [Vitis vinifera]	--	--	--
Unigene4325.1	939	2.6101	8.05859	44.7516	60.7243	58.6597	gi|359491682|ref|XP_003634304.1|	3e-82	PREDICTED: uncharacterized protein At5g01610-like [Vitis vinifera] >gi|147778229|emb|CAN69724.1| hypothetical protein VITISV_018889 [Vitis vinifera] >gi|297733933|emb|CBI15180.3| unnamed protein product [Vitis vinifera]	sp|Q9M015|Y5161_ARATH	3e-49	Uncharacterized protein At5g01610 OS=Arabidopsis thaliana GN=At5g01610 PE=1 SV=1
Unigene4325.2	348	1.56506	5.07367	44.7493	52.1344	62.3316	gi|224101419|ref|XP_002312271.1|	8e-46	predicted protein [Populus trichocarpa] >gi|222852091|gb|EEE89638.1| predicted protein [Populus trichocarpa]	sp|Q9M015|Y5161_ARATH	4e-27	Uncharacterized protein At5g01610 OS=Arabidopsis thaliana GN=At5g01610 PE=1 SV=1
Unigene4349	1074	0.507115	0.234855	6.90465	8.77543	8.85029	gi|359477883|ref|XP_002266203.2|	3e-110	PREDICTED: ER lumen protein retaining receptor-like [Vitis vinifera]	sp|Q9ZTN2|ERD2_PETHY	1e-110	ER lumen protein retaining receptor OS=Petunia hybrida GN=ERD2 PE=2 SV=1
Unigene4426.2	1847	8.40405	63.0926	264.718	289.327	346.649	gi|396578192|gb|AFN85668.1|	0	putative hydroxycinnamoyl CoA shikimate/quinate hydroxycinnamoyl transferase [Hibiscus cannabinus]	sp|Q9FI78|HCT_ARATH	0	Hydroxycinnamoyl-Coenzyme A shikimate/quinate hydroxycinnamoyltransferase OS=Arabidopsis thaliana GN=HCT PE=2 SV=1
Unigene4442	1503	9.96516	9.73357	5.92064	4.2327	3.40532	gi|225436573|ref|XP_002274759.1|	0	PREDICTED: hexokinase-3 [Vitis vinifera] >gi|297734960|emb|CBI17194.3| unnamed protein product [Vitis vinifera]	sp|Q9LPS1|HXK3_ARATH	0	Hexokinase-3 OS=Arabidopsis thaliana GN=At1g50460 PE=1 SV=1
Unigene4460	1904	4.14774	5.69646	24.2773	26.1113	32.7695	gi|255554867|ref|XP_002518471.1|	3e-173	prephenate dehydratase, putative [Ricinus communis] >gi|223542316|gb|EEF43858.1| prephenate dehydratase, putative [Ricinus communis]	sp|Q9SA96|AROD1_ARATH	1e-144	Arogenate dehydratase/prephenate dehydratase 1, chloroplastic OS=Arabidopsis thaliana GN=ADT1 PE=1 SV=1
Unigene4523	1265	29.0619	53.4377	116.852	118.835	101.728	gi|357479697|ref|XP_003610134.1|	4e-129	Yip1 domain family member [Medicago truncatula] >gi|355511189|gb|AES92331.1| Yip1 domain family member [Medicago truncatula]	sp|Q9FFW5|PERK8_ARATH	2e-08	Proline-rich receptor-like protein kinase PERK8 OS=Arabidopsis thaliana GN=PERK8 PE=1 SV=1
Unigene4531.3	684	3.9813	4.42515	8.31183	9.3008	9.62066	gi|225465010|ref|XP_002264665.1|	3e-55	PREDICTED: protein KRTCAP2 homolog [Vitis vinifera] >gi|297736152|emb|CBI24190.3| unnamed protein product [Vitis vinifera]	--	--	--
Unigene4548.2	1491	3.28757	8.28937	23.7074	26.0747	31.5484	gi|225462522|ref|XP_002264528.1|	0	PREDICTED: galacturonokinase [Vitis vinifera] >gi|296090474|emb|CBI40670.3| unnamed protein product [Vitis vinifera]	sp|Q8VYG2|GALAK_ARATH	8e-173	Galacturonokinase OS=Arabidopsis thaliana GN=GALAK PE=1 SV=1
Unigene4619	1396	0.390144	9.57621	90.3046	106.164	109.117	gi|225456920|ref|XP_002278063.1|	1e-142	PREDICTED: transcription factor MYB39 [Vitis vinifera]	sp|Q8LPH6|MYB86_ARATH	1e-64	Transcription factor MYB86 OS=Arabidopsis thaliana GN=MYB86 PE=2 SV=1
Unigene4661.2	1017	2.40992	1.98414	7.53469	5.32868	5.75159	gi|359477883|ref|XP_002266203.2|	5e-108	PREDICTED: ER lumen protein retaining receptor-like [Vitis vinifera]	sp|Q9ZTN2|ERD2_PETHY	2e-108	ER lumen protein retaining receptor OS=Petunia hybrida GN=ERD2 PE=2 SV=1
Unigene4843.1	1085	19.828	19.5278	10.0242	6.29769	6.51427	gi|225435251|ref|XP_002284945.1|	1e-17	PREDICTED: E3 SUMO-protein ligase SIZ1-like [Vitis vinifera]	sp|Q680Q4|SIZ1_ARATH	1e-10	E3 SUMO-protein ligase SIZ1 OS=Arabidopsis thaliana GN=SIZ1 PE=1 SV=2
Unigene4866.1	786	2.77171	3.20908	5.03179	5.99543	8.68226	gi|111038269|gb|ABH03531.1|	3e-12	class II knotted-like homeobox protein [Prunus persica] >gi|215983122|gb|ACJ71731.1| class II knotted-like homeobox transcription factor [Prunus persica]	sp|P48000|KNAT3_ARATH	4e-11	Homeobox protein knotted-1-like 3 OS=Arabidopsis thaliana GN=KNAT3 PE=1 SV=1
Unigene4901.4	3294	1.40542	34.0753	699.011	783.97	746.782	gi|212960378|gb|ACJ38665.1|	5e-32	cellulose synthase [Betula luminifera]	sp|Q9SWW6|CESA7_ARATH	0	Cellulose synthase A catalytic subunit 7 [UDP-forming] OS=Arabidopsis thaliana GN=CESA7 PE=1 SV=1
Unigene4901.5	3397	2.16446	36.2349	538.106	635.766	623.837	gi|212960342|gb|ACJ38664.1|	0	cellulose synthase [Betula luminifera]	sp|Q8LPK5|CESA8_ARATH	0	Cellulose synthase A catalytic subunit 8 [UDP-forming] OS=Arabidopsis thaliana GN=CESA8 PE=1 SV=1
Unigene4913	629	7.79296	8.02015	5.10878	3.74595	1.16243	gi|15240634|ref|NP_199832.1|	6e-12	quinolinate synthase [Arabidopsis thaliana] >gi|332008529|gb|AED95912.1| quinolinate synthase [Arabidopsis thaliana]	sp|Q9LK03|PERK2_ARATH	3e-07	Proline-rich receptor-like protein kinase PERK2 OS=Arabidopsis thaliana GN=PERK2 PE=2 SV=3
Unigene5007.2	1478	2.76374	15.8713	77.2667	75.2455	68.9286	gi|357512065|ref|XP_003626321.1|	5e-16	GDSL esterase/lipase [Medicago truncatula] >gi|355501336|gb|AES82539.1| GDSL esterase/lipase [Medicago truncatula]	sp|Q3ECP6|GDL22_ARATH	3e-150	GDSL esterase/lipase At1g54790 OS=Arabidopsis thaliana GN=At1g54790 PE=2 SV=1
Unigene5026.1	1952	72.684	50.9119	37.2299	14.847	8.36551	gi|2341043|gb|AAB70448.1|	0	Strong similarity to Arabidopsis REV3C (gb|X62461) [Arabidopsis thaliana] >gi|111074216|gb|ABH04481.1| At1g04280 [Arabidopsis thaliana]	--	--	--
Unigene5070	1293	0.210612	2.53599	27.3377	22.5962	16.9645	gi|225447061|ref|XP_002269660.1|	1e-133	PREDICTED: mitogen-activated protein kinase kinase kinase A [Vitis vinifera] >gi|297739169|emb|CBI28820.3| unnamed protein product [Vitis vinifera]	sp|O22040|ANP1_ARATH	9e-50	Mitogen-activated protein kinase kinase kinase ANP1 OS=Arabidopsis thaliana GN=ANP1 PE=1 SV=2
Unigene5167	426	0.001	0.592098	7.54325	4.97789	5.14909	gi|110288963|gb|AAP53315.2|	6e-16	retrotransposon protein, putative, unclassified [Oryza sativa Japonica Group]	--	--	--
Unigene5252	837	4.55495	4.82167	10.6317	10.6972	10.4827	gi|356503650|ref|XP_003520619.1|	6e-121	PREDICTED: receptor-like serine/threonine-protein kinase ALE2-like [Glycine max]	sp|Q8RWW0|ALE2_ARATH	9e-97	Receptor-like serine/threonine-protein kinase ALE2 OS=Arabidopsis thaliana GN=ALE2 PE=1 SV=1
Unigene5338	1035	41.3086	49.2282	98.1582	113.143	181.556	gi|371501272|dbj|BAL44263.1|	4e-97	ADP-ribosylation factor-like 8b [Nicotiana tabacum]	sp|P40940|ARF3_ARATH	5e-27	ADP-ribosylation factor 3 OS=Arabidopsis thaliana GN=ARF3 PE=1 SV=2
Unigene5364	1814	46.2375	43.5221	91.0257	72.8682	75.1055	gi|255556974|ref|XP_002519520.1|	0	isocitrate dehydrogenase, putative [Ricinus communis] >gi|223541383|gb|EEF42934.1| isocitrate dehydrogenase, putative [Ricinus communis]	sp|Q945K7|IDH5_ARATH	0	Isocitrate dehydrogenase [NAD] catalytic subunit 5, mitochondrial OS=Arabidopsis thaliana GN=IDH5 PE=1 SV=1
Unigene5424	1158	17.4022	23.5244	50.59	53.3096	44.6195	gi|356510709|ref|XP_003524078.1|	7e-111	PREDICTED: ubiquitin carboxyl-terminal hydrolase isozyme L3 [Glycine max] >gi|255633042|gb|ACU16876.1| unknown [Glycine max]	--	--	--
Unigene5449.1	4649	54.7688	51.8683	27.9142	24.8848	21.9136	gi|297795169|ref|XP_002865469.1|	0	GYF domain-containing protein [Arabidopsis lyrata subsp. lyrata] >gi|297311304|gb|EFH41728.1| GYF domain-containing protein [Arabidopsis lyrata subsp. lyrata]	sp|P04725|GDA5_WHEAT	4e-07	Alpha/beta-gliadin A-V OS=Triticum aestivum PE=2 SV=1
Unigene5469	534	43.8569	43.456	23.6077	14.5608	33.7744	gi|225463420|ref|XP_002272204.1|	6e-59	PREDICTED: probable purine permease 10-like [Vitis vinifera]	sp|O49725|PUP10_ARATH	1e-56	Probable purine permease 10 OS=Arabidopsis thaliana GN=PUP10 PE=2 SV=2
Unigene5474	751	23.2071	20.8236	6.91201	4.07865	4.21891	gi|186502112|ref|NP_179763.3|	2e-70	transcription termination factor family protein [Arabidopsis thaliana] >gi|330252119|gb|AEC07213.1| transcription termination factor family protein [Arabidopsis thaliana]	--	--	--
Unigene5566	623	17.9216	16.5997	6.34829	2.64742	12.5187	gi|255586059|ref|XP_002533696.1|	1e-30	basic helix-loop-helix-containing protein, putative [Ricinus communis] >gi|223526407|gb|EEF28691.1| basic helix-loop-helix-containing protein, putative [Ricinus communis]	sp|P0C7P8|LHWL1_ARATH	2e-13	Transcription factor EMB1444 OS=Arabidopsis thaliana GN=EMB1444 PE=2 SV=1
Unigene5730	1987	7.94897	10.5362	25.0048	19.6844	18.1535	gi|124359898|gb|ABD33348.2|	0	IMP dehydrogenase/GMP reductase, putative [Medicago truncatula]	--	--	--
Unigene5760.3	2070	7.63024	78.1072	525.54	587.799	534.425	gi|212960469|gb|ACJ38668.1|	0	4-coumarate coenzyme A ligase [Betula luminifera]	sp|O24146|4CL2_TOBAC	0	4-coumarate--CoA ligase 2 OS=Nicotiana tabacum GN=4CL2 PE=2 SV=1
Unigene5803.1	2567	6.57728	9.72775	128.552	201.292	63.708	gi|225441006|ref|XP_002283672.1|	0	PREDICTED: glucomannan 4-beta-mannosyltransferase 9 [Vitis vinifera]	sp|Q9LZR3|CSLA9_ARATH	0	Glucomannan 4-beta-mannosyltransferase 9 OS=Arabidopsis thaliana GN=CSLA9 PE=2 SV=1
Unigene5827.2	474	59.1752	63.3245	137.674	111.845	106.95	gi|223469631|gb|ACM90156.1|	1e-52	40S ribosomal protein S15-like protein [Jatropha curcas]	sp|Q9FY64|RS154_ARATH	4e-52	40S ribosomal protein S15-4 OS=Arabidopsis thaliana GN=RPS15D PE=2 SV=1
Unigene5872	1693	8.84681	11.9189	25.4049	23.3811	21.306	gi|255567389|ref|XP_002524674.1|	0	Sphingosine kinase, putative [Ricinus communis] >gi|223536035|gb|EEF37693.1| Sphingosine kinase, putative [Ricinus communis]	sp|Q9LRB0|LCBK1_ARATH	7e-21	Sphingoid long-chain bases kinase 1 OS=Arabidopsis thaliana GN=LCBK1 PE=1 SV=1
Unigene5962.1	1381	18.536	21.9175	30.7865	34.8056	46.7681	gi|357491619|ref|XP_003616097.1|	1e-99	Cbs domain protein [Medicago truncatula] >gi|355517432|gb|AES99055.1| Cbs domain protein [Medicago truncatula]	sp|Q9LEV3|CBSX3_ARATH	1e-93	CBS domain-containing protein CBSX3, mitochondrial OS=Arabidopsis thaliana GN=CBSX3 PE=1 SV=1
Unigene5976.1	2093	36.561	60.4975	195.222	197.908	158.95	gi|359494836|ref|XP_002269934.2|	0	PREDICTED: pyrophosphate--fructose 6-phosphate 1-phosphotransferase subunit beta-like [Vitis vinifera] >gi|297741775|emb|CBI33004.3| unnamed protein product [Vitis vinifera]	sp|Q41141|PFPB_RICCO	0	Pyrophosphate--fructose 6-phosphate 1-phosphotransferase subunit beta OS=Ricinus communis GN=PFP-BETA PE=3 SV=1
Unigene6035	1152	12.765	13.1372	34.3315	38.6565	35.1199	gi|255582802|ref|XP_002532175.1|	1e-101	Protein transport protein SFT2, putative [Ricinus communis] >gi|223528143|gb|EEF30212.1| Protein transport protein SFT2, putative [Ricinus communis]	--	--	--
Unigene606	2152	8.09876	7.14975	55.2494	72.4817	35.6751	gi|359497396|ref|XP_003635501.1|	0	PREDICTED: receptor-like cytosolic serine/threonine-protein kinase RBK1-like [Vitis vinifera] >gi|297739417|emb|CBI29579.3| unnamed protein product [Vitis vinifera]	sp|Q8H1D6|RBK1_ARATH	1e-159	Receptor-like cytosolic serine/threonine-protein kinase RBK1 OS=Arabidopsis thaliana GN=RBK1 PE=1 SV=1
Unigene6072.1	782	73.4779	74.8315	150.777	114.195	117.498	gi|255583494|ref|XP_002532505.1|	1e-63	40S ribosomal protein S11, putative [Ricinus communis] >gi|223527780|gb|EEF29881.1| 40S ribosomal protein S11, putative [Ricinus communis]	sp|P17093|RS11_SOYBN	6e-63	40S ribosomal protein S11 OS=Glycine max GN=RPS11 PE=2 SV=2
Unigene6608.2	1389	1.56844	3.99506	7.65228	11.7047	11.7563	gi|225441904|ref|XP_002284451.1|	4e-149	PREDICTED: probable sugar phosphate/phosphate translocator At5g04160 [Vitis vinifera] >gi|147819472|emb|CAN61104.1| hypothetical protein VITISV_024947 [Vitis vinifera]	sp|Q9SS40|PT310_ARATH	1e-149	Probable sugar phosphate/phosphate translocator At3g10290 OS=Arabidopsis thaliana GN=At3g10290 PE=3 SV=1
Unigene6783	966	1.97334	70.239	484.649	481.729	410.243	gi|297815530|ref|XP_002875648.1|	5e-66	harpin-induced family protein [Arabidopsis lyrata subsp. lyrata] >gi|297321486|gb|EFH51907.1| harpin-induced family protein [Arabidopsis lyrata subsp. lyrata]	sp|Q9FFW5|PERK8_ARATH	2e-09	Proline-rich receptor-like protein kinase PERK8 OS=Arabidopsis thaliana GN=PERK8 PE=1 SV=1
Unigene6834	1428	30.1307	51.4006	120.997	129.03	152.754	gi|225439930|ref|XP_002280272.1|	5e-130	PREDICTED: syntaxin-71 [Vitis vinifera] >gi|297741579|emb|CBI32711.3| unnamed protein product [Vitis vinifera]	sp|Q9SF29|SYP71_ARATH	1e-118	Syntaxin-71 OS=Arabidopsis thaliana GN=SYP71 PE=1 SV=1
Unigene6835	1330	70.4348	77.1873	157.233	145.093	118.38	gi|225427923|ref|XP_002275216.1|	3e-115	PREDICTED: translocon-associated protein subunit alpha [Vitis vinifera] >gi|147821778|emb|CAN77171.1| hypothetical protein VITISV_029842 [Vitis vinifera] >gi|297744658|emb|CBI37920.3| unnamed protein product [Vitis vinifera]	sp|P45434|SSRA_ARATH	4e-84	Translocon-associated protein subunit alpha OS=Arabidopsis thaliana GN=At2g21160 PE=2 SV=3
Unigene7066	471	173.453	148.877	75.573	63.5324	40.8793	gi|255539919|ref|XP_002511024.1|	1e-37	methionine sulfoxide reductase, putative [Ricinus communis] >gi|223550139|gb|EEF51626.1| methionine sulfoxide reductase, putative [Ricinus communis]	sp|P54150|MSRA4_ARATH	2e-34	Peptide methionine sulfoxide reductase A4, chloroplastic OS=Arabidopsis thaliana GN=MSR4 PE=1 SV=2
Unigene7152	2499	34.98	38.7586	85.264	90.6087	107.866	gi|225450825|ref|XP_002284019.1|	0	PREDICTED: acyl-CoA-binding domain-containing protein 4-like isoform 1 [Vitis vinifera]	sp|Q9MA55|ACBP4_ARATH	0	Acyl-CoA-binding domain-containing protein 4 OS=Arabidopsis thaliana GN=ACBP4 PE=1 SV=1
Unigene7169	3882	3.22688	10.2661	56.4798	50.8629	42.0018	gi|255543819|ref|XP_002512972.1|	0	kinesin heavy chain, putative [Ricinus communis] >gi|223547983|gb|EEF49475.1| kinesin heavy chain, putative [Ricinus communis]	sp|P46869|FLA10_CHLRE	5e-64	Kinesin-like protein FLA10 OS=Chlamydomonas reinhardtii GN=FLA10 PE=1 SV=1
Unigene7174	1635	0.832785	3.70251	13.7578	14.2669	18.037	gi|225434299|ref|XP_002275951.1|	7e-156	PREDICTED: RING finger and transmembrane domain-containing protein 2-like [Vitis vinifera]	sp|Q9SLC4|ATL40_ARATH	4e-06	RING-H2 finger protein ATL40 OS=Arabidopsis thaliana GN=ATL40 PE=2 SV=1
Unigene7219	2353	0.694401	53.1696	1087.28	1291.36	1179.46	gi|224139024|ref|XP_002322961.1|	0	laccase 1a [Populus trichocarpa] >gi|222867591|gb|EEF04722.1| laccase 1a [Populus trichocarpa]	sp|O80434|LAC4_ARATH	0	Laccase-4 OS=Arabidopsis thaliana GN=IRX12 PE=2 SV=2
Unigene7374	685	11.9265	11.415	5.41284	3.78368	4.62541	gi|297793891|ref|XP_002864830.1|	9e-87	EMB1692 [Arabidopsis lyrata subsp. lyrata] >gi|297310665|gb|EFH41089.1| EMB1692 [Arabidopsis lyrata subsp. lyrata]	--	--	--
Unigene7786	1236	0.881297	19.3869	123.193	189.678	87.7483	gi|359472655|ref|XP_002282967.2|	5e-35	PREDICTED: zinc finger CCCH domain-containing protein 15 [Vitis vinifera]	sp|Q9C9F5|C3H15_ARATH	3e-22	Zinc finger CCCH domain-containing protein 15 OS=Arabidopsis thaliana GN=At1g68200 PE=2 SV=1
Unigene802.7	300	0.907736	2.52234	12.3593	16.4934	27.622	gi|356524071|ref|XP_003530656.1|	9e-37	PREDICTED: serine/threonine-protein kinase PBS1-like [Glycine max]	sp|Q8GX23|PERK5_ARATH	5e-17	Proline-rich receptor-like protein kinase PERK5 OS=Arabidopsis thaliana GN=PERK5 PE=2 SV=1
Unigene8214	2204	31.2601	34.1042	103.966	85.5246	73.9796	gi|255560715|ref|XP_002521371.1|	0	dihydrolipoamide acetyltransferase component of pyruvate dehydrogenase, putative [Ricinus communis] >gi|223539449|gb|EEF41039.1| dihydrolipoamide acetyltransferase component of pyruvate dehydrogenase, putative [Ricinus communis]	sp|Q5M729|OPD23_ARATH	0	Dihydrolipoyllysine-residue acetyltransferase component 3 of pyruvate dehydrogenase complex, mitochondrial OS=Arabidopsis thaliana GN=At1g54220 PE=1 SV=1
Unigene8282	1473	106.858	112.503	212.45	253.056	284.923	gi|255548505|ref|XP_002515309.1|	3e-178	protein disulfide isomerase, putative [Ricinus communis] >gi|223545789|gb|EEF47293.1| protein disulfide isomerase, putative [Ricinus communis]	sp|P38661|PDIA6_MEDSA	9e-166	Probable protein disulfide-isomerase A6 OS=Medicago sativa PE=2 SV=1
Unigene8351	474	0.001	1.59642	14.0802	20.8778	9.25532	gi|255560467|ref|XP_002521248.1|	1e-23	conserved hypothetical protein [Ricinus communis] >gi|223539516|gb|EEF41104.1| conserved hypothetical protein [Ricinus communis]	--	--	--
Unigene845	783	8.347	7.08703	5.68245	3.91196	3.11269	gi|255568136|ref|XP_002525044.1|	2e-48	nuclear inhibitor of protein phosphatase-1, putative [Ricinus communis] >gi|223535706|gb|EEF37371.1| nuclear inhibitor of protein phosphatase-1, putative [Ricinus communis]	--	--	--
Unigene8660	1240	5.27072	22.579	148.711	140.992	106.924	gi|255566036|ref|XP_002524006.1|	1e-79	ring finger protein, putative [Ricinus communis] >gi|223536733|gb|EEF38374.1| ring finger protein, putative [Ricinus communis]	sp|Q9LF64|ATL52_ARATH	1e-71	RING-H2 finger protein ATL52 OS=Arabidopsis thaliana GN=ATL52 PE=2 SV=1
Unigene8670	3050	30.6249	31.3431	21.801	14.4462	14.064	gi|359488533|ref|XP_002276845.2|	0	PREDICTED: uncharacterized protein LOC100260052 [Vitis vinifera]	--	--	--
Unigene8702	1892	0.863597	21.4639	313.817	550.943	123.021	gi|47717925|gb|AAT37954.1|	8e-82	fasciclin-like AGP 11 [Populus tremula x Populus alba]	sp|Q8LEJ6|FLA11_ARATH	4e-75	Fasciclin-like arabinogalactan protein 11 OS=Arabidopsis thaliana GN=FLA11 PE=2 SV=2
Unigene8832	1358	1.60425	23.0317	416.103	531.447	557.98	gi|3482933|gb|AAC33218.1|	5e-114	Similar to cdc2 protein kinases [Arabidopsis thaliana]	--	--	--
Unigene9068	1874	28.3365	86.0071	280.558	273.214	240.472	gi|359497849|ref|XP_003635669.1|	0	PREDICTED: phosphoserine aminotransferase, chloroplastic-like [Vitis vinifera]	sp|Q96255|SERC_ARATH	0	Phosphoserine aminotransferase, chloroplastic OS=Arabidopsis thaliana GN=At4g35630 PE=2 SV=1
Unigene9137	243	16.8099	12.456	9.15506	3.87852	2.00595	gi|255561657|ref|XP_002521838.1|	3e-35	pentatricopeptide repeat-containing protein, putative [Ricinus communis] >gi|223538876|gb|EEF40474.1| pentatricopeptide repeat-containing protein, putative [Ricinus communis]	sp|Q9XIL5|PP154_ARATH	2e-28	Pentatricopeptide repeat-containing protein At2g15820 OS=Arabidopsis thaliana GN=At2g15820 PE=2 SV=3
Unigene9484	387	9.8514	9.12474	5.74853	3.04419	2.51911	gi|225430190|ref|XP_002282419.1|	5e-61	PREDICTED: pentatricopeptide repeat-containing protein At5g11310, mitochondrial [Vitis vinifera] >gi|296081989|emb|CBI20994.3| unnamed protein product [Vitis vinifera]	sp|Q9LFM6|PP375_ARATH	7e-46	Pentatricopeptide repeat-containing protein At5g11310, mitochondrial OS=Arabidopsis thaliana GN=At5g11310 PE=2 SV=1
Unigene9501	929	99.9584	122.451	320.624	275.947	227.195	gi|357481555|ref|XP_003611063.1|	8e-94	40S ribosomal protein S10-like protein [Medicago truncatula] >gi|355512398|gb|AES94021.1| 40S ribosomal protein S10-like protein [Medicago truncatula]	sp|Q9AYP4|RS10_ORYSJ	2e-83	40S ribosomal protein S10 OS=Oryza sativa subsp. japonica GN=RPS10 PE=2 SV=2
Unigene9530	1188	9.6275	63.9077	468.156	547.599	537.71	gi|225432568|ref|XP_002281089.1|	1e-71	PREDICTED: uncharacterized GPI-anchored protein At3g06035 [Vitis vinifera] >gi|297737004|emb|CBI26205.3| unnamed protein product [Vitis vinifera]	sp|Q84MC0|UGPI4_ARATH	2e-58	Uncharacterized GPI-anchored protein At3g06035 OS=Arabidopsis thaliana GN=At3g06035 PE=2 SV=1
Unigene9640	2103	73.9397	115.142	408.451	305.197	331.802	gi|255579936|ref|XP_002530803.1|	0	6-phosphogluconate dehydrogenase, putative [Ricinus communis] >gi|223529624|gb|EEF31571.1| 6-phosphogluconate dehydrogenase, putative [Ricinus communis]	--	--	--
Unigene9722	361	8.29786	11.878	30.128	39.814	42.5335	gi|224065140|ref|XP_002301687.1|	1e-21	leucine-rich repeat transmembrane protein [Populus trichocarpa] >gi|222843413|gb|EEE80960.1| leucine-rich repeat transmembrane protein [Populus trichocarpa]	sp|O48788|Y2267_ARATH	7e-17	Probable inactive receptor kinase At2g26730 OS=Arabidopsis thaliana GN=At2g26730 PE=1 SV=1
Unigene10831	321	9.33186	8.64353	4.62031	3.6701	2.27779	No hit
Unigene11156	588	28.251	26.1671	14.7135	11.22	12.4349	No hit
Unigene13442	342	18.314	16.2256	5.78214	2.06684	0.712642	No hit
Unigene14532	476	21.7399	20.6662	6.75089	6.43501	6.14429	No hit
Unigene15906	357	10.6792	9.89152	6.92399	5.28001	4.77889	No hit
Unigene17088	214	1.27253	4.71465	43.8929	46.2432	43.278	No hit
Unigene17592	675	17.3478	13.4525	7.69025	2.79254	1.80536	No hit
Unigene18129	434	8.15707	7.55539	3.98688	0.001	0.561575	No hit
Unigene19088	300	2.72321	9.24857	14.8312	22.7766	23.5599	No hit
Unigene19269	340	0.001	9.64423	39.9861	52.6681	90.321	No hit
Unigene19812	264	0.001	9.55431	76.7777	72.2926	56.3149	No hit
Unigene2049	312	0.001	5.65909	38.0287	46.0668	60.1497	No hit
Unigene2414.1	424	14.1299	13.6825	5.24689	6.6685	8.04747	No hit
Unigene24232	337	0.808074	1.49694	11.7359	6.29253	7.95536	No hit
Unigene3728.4	1463	11.5406	15.172	202.075	358.665	336.515	No hit
Unigene4476	536	47.2497	44.7056	27.6701	13.6273	32.739	No hit
Unigene4495.1	351	27.9303	44.5541	161.974	116.132	134.013	No hit
